# Supplementary material for: The Lewis Pair Polymerization of Lactones Using Metal Halides and N-Heterocyclic Olefins: Theoretical Insights
Source: MDPI journal article supplement (doi:10.3390/molecules23020432), 2018-02-15
Supplement: s1 [file s1]

# Supporting Information to

## The Lewis Pair Polymerization of Lactones Using Metal Halides and N-Heterocyclic Olefins: Theoretical Insights

**Jan Meisner<sup>1</sup>, Johannes Karwounopoulos<sup>1</sup>, Patrick Walther<sup>2</sup>, Johannes Kästner<sup>1</sup> and Stefan Naumann<sup>2,\*</sup>**

<sup>1</sup> Institute of Theoretical Chemistry, University of Stuttgart, Pfaffenwaldring 55, D-70569 Stuttgart, Germany;

<sup>2</sup> Institute of Polymer Chemistry, University of Stuttgart, Pfaffenwaldring 55, D-70569 Stuttgart, Germany;

\* Correspondence: stefan.naumann@ipoc.uni-stuttgart.de, Tel.: +49 0711 685 64090.

|                                                                                   |    |
|-----------------------------------------------------------------------------------|----|
| Molecular structures .....                                                        | 2  |
| THF .....                                                                         | 2  |
| NHOs .....                                                                        | 2  |
| NHO Adducts .....                                                                 | 8  |
| Lactones .....                                                                    | 36 |
| Tetrahedral [MgCl <sub>2</sub> (THF)(Lac)] complexes .....                        | 38 |
| Trigonal-bipyramidal [MgCl <sub>2</sub> (THF) <sub>2</sub> (Lac)] complexes ..... | 45 |
| Structures related to the proton transfer reaction .....                          | 56 |
| Details to the calculations of the metal-free deprotonation .....                 | 61 |
| References .....                                                                  | 62 |

## Molecular structures

Molecular structures of all calculated stationary points and minima (transition structures) were ensured to have no (one) imaginary vibrational frequency larger than  $50i\text{ cm}^{-1}$ .

### THF

13

H -1.571636 1.288654 -1.100552  
H -4.072959 1.209388 -2.335639  
H -3.058522 0.979955 -0.134227  
C -2.437940 0.609211 -0.979598  
H -2.627407 0.537420 -3.154682  
C -3.271775 0.451616 -2.257315  
O -1.942723 -0.711339 -0.656422  
C -3.807510 -0.984890 -2.114469  
H -4.689104 -1.004720 -1.443492  
H -4.099189 -1.439141 -3.079280  
C -2.620094 -1.703729 -1.462339  
H -1.913065 -2.093614 -2.227522  
H -2.920416 -2.543173 -0.805194

### NHOs

NHO 1:

20

C -3.803223 1.761383 0.289783  
C -4.558486 0.445539 0.494028  
N -2.464506 1.270280 -0.042913  
N -3.893805 -0.418458 -0.484202  
C -2.574100 0.018365 -0.661074  
C -1.577263 -0.653472 -1.317067  
H -0.592881 -0.196502 -1.462536  
H -1.744176 -1.660890 -1.712271  
C -1.430442 2.207382 -0.427723  
C -4.226529 -1.826863 -0.534174  
H -1.493887 3.099093 0.221385  
H -1.520904 2.532690 -1.490461  
H -0.430348 1.756302 -0.285796  
H -5.320673 -1.942064 -0.433817

H -3.730563 -2.412017 0.275281  
H -3.929090 -2.258432 -1.508199  
H -4.247955 2.349283 -0.548736  
H -3.781057 2.400205 1.191976  
H -4.424323 0.068032 1.536180  
H -5.641693 0.523371 0.286707

NHO 2:

23

Energy = 0.00 kcal/mol

C -3.656110 2.286985 0.374247  
C -5.058593 0.238957 0.358321  
N -2.495047 1.433630 0.099002  
N -3.841518 -0.532205 0.082102  
C -2.713343 0.143665 -0.422453  
C -1.832277 -0.451861 -1.295982  
C -1.330019 2.159400 -0.380278  
C -4.094749 -1.874088 -0.416830  
H -1.258510 3.112941 0.171470  
H -1.379882 2.390063 -1.471127  
H -0.406604 1.581233 -0.191653  
H -4.960137 -2.293220 0.125610  
H -3.222621 -2.528505 -0.233415  
H -4.323206 -1.896035 -1.509103  
H -0.926179 0.059815 -1.629395  
H -1.978158 -1.477521 -1.643344  
C -4.728320 1.511100 1.127835  
H -4.082676 2.698299 -0.574835  
H -3.306131 3.150968 0.970040  
H -5.637125 2.132522 1.238663  
H -4.362713 1.252979 2.141525  
H -5.741558 -0.406130 0.942650  
H -5.590104 0.498332 -0.591411

NHO 3:

24

Energy = 0.00 kcal/mol

C -3.813551 1.690036 0.383138  
C -4.576888 0.548081 0.376609  
C -5.953065 0.294866 0.894960  
H -6.365986 1.215525 1.342034  
H -5.969476 -0.492858 1.677697  
H -6.650547 -0.028268 0.093343  
C -4.106464 3.053590 0.913712  
H -4.066160 3.830518 0.121196  
H -3.389543 3.358695 1.705253  
H -5.118071 3.081115 1.353976

N -2.584242 1.374490 -0.236056  
 N -3.812780 -0.461829 -0.248404  
 C -2.574860 0.041745 -0.635517  
 C -1.556917 -0.633781 -1.279724  
 C -1.470889 2.258697 -0.486801  
 C -4.189765 -1.835985 -0.480652  
 H -1.683945 3.259203 -0.078361  
 H -1.279030 2.353164 -1.576622  
 H -0.546285 1.872009 -0.009559  
 H -5.205526 -2.018857 -0.095795  
 H -3.487571 -2.528558 0.029332  
 H -4.174518 -2.071767 -1.565522  
 H -0.621755 -0.124062 -1.531936  
 H -1.666785 -1.690210 -1.543894

NHO 4:

26

Energy = 0.00 kcal/mol

C -3.635339 1.668150 0.520071  
 C -4.555036 0.461336 0.445459  
 N -2.661872 1.405106 -0.552690  
 N -3.655098 -0.608317 -0.015722  
 C -2.590454 -0.004469 -0.743645  
 C -1.653187 -0.668630 -1.497020  
 C -0.785390 0.028307 -2.523368  
 H -1.236396 0.965671 -2.898347  
 H -0.657305 -0.637551 -3.402376  
 H 0.242642 0.263142 -2.163918  
 C -1.406867 -2.156451 -1.365508  
 H -1.898727 -2.769856 -2.154934  
 H -1.718458 -2.555021 -0.382164  
 H -0.318332 -2.353412 -1.459320  
 C -1.424746 2.162046 -0.367629  
 C -4.389334 -1.721291 -0.615036  
 H -1.687146 3.211575 -0.141425  
 H -0.798052 2.162948 -1.271819  
 H -0.821672 1.757801 0.478910  
 H -5.209193 -2.008576 0.068538  
 H -3.753658 -2.606540 -0.764088  
 H -4.832831 -1.436150 -1.597905  
 H -5.025680 0.205813 1.413405  
 H -5.368100 0.632151 -0.299943  
 H -4.158388 2.630545 0.365509  
 H -3.120301 1.709353 1.509429

NHO 5:

29

Energy = 0.00 kcal/mol

C -3.920622 2.264719 -0.029433  
C -4.675481 0.086537 0.913881  
N -2.695726 1.628864 -0.531147  
N -4.006194 -0.335892 -0.318676  
C -2.803514 0.229070 -0.760137  
C -1.832421 -0.476862 -1.442805  
C -1.476579 2.104675 0.124332  
C -4.655499 -1.400057 -1.060927  
H -1.423425 1.823231 1.202683  
H -1.433341 3.207406 0.050320  
H -0.583027 1.694876 -0.370952  
H -5.745723 -1.196592 -1.119845  
H -4.532487 -2.408526 -0.606906  
H -4.243501 -1.430971 -2.084249  
C -0.823723 0.210232 -2.331929  
C -1.685286 -1.977606 -1.338042  
C -4.384540 1.563503 1.253451  
H -4.710431 2.207294 -0.805919  
H -3.711713 3.336516 0.145599  
H -5.286253 2.044288 1.679597  
H -3.590006 1.647332 2.020683  
H -4.409572 -0.576769 1.770394  
H -5.763715 -0.049567 0.746747  
H -0.621108 -2.241914 -1.153493  
H -1.972408 -2.519237 -2.268737  
H -2.272435 -2.403843 -0.505305  
H 0.195805 0.276316 -1.883389  
H -1.139146 1.237082 -2.598190  
H -0.695632 -0.361578 -3.276744

NHO 6:

30

Energy = 0.00 kcal/mol

C -3.993544 1.654836 0.250773  
C -4.627478 0.460011 0.451467  
C -5.905111 0.158759 1.163231  
H -6.285355 1.064099 1.667394  
H -5.766497 -0.624664 1.936919  
H -6.706040 -0.197899 0.481362  
C -4.364336 3.027007 0.708544  
H -4.400095 3.743630 -0.138433  
H -3.652904 3.441962 1.453425  
H -5.361873 3.016831 1.181165  
N -2.824442 1.407112 -0.514147  
N -3.856080 -0.554811 -0.170229

C -2.725467 0.025081 -0.782529  
 C -1.729217 -0.619135 -1.496299  
 C -0.857737 0.095723 -2.506774  
 H -1.255647 1.083206 -2.801330  
 H -0.793925 -0.510005 -3.438508  
 H 0.195894 0.243643 -2.172973  
 C -1.419465 -2.091523 -1.333293  
 H -1.694912 -2.709306 -2.219665  
 H -1.901350 -2.543510 -0.448274  
 H -0.322821 -2.231598 -1.200702  
 C -1.647736 2.261414 -0.442378  
 C -4.432921 -1.807068 -0.634373  
 H -1.792307 3.028334 0.337301  
 H -1.429545 2.778649 -1.396756  
 H -0.766533 1.646899 -0.171727  
 H -5.532109 -1.764577 -0.550448  
 H -4.078206 -2.686146 -0.061186  
 H -4.168703 -1.957311 -1.699448

NHO 7:

30

Energy = 0.00 kcal/mol

C -3.861766 1.892710 0.206380  
 C -4.647426 0.715407 0.323376  
 C -5.897058 0.739849 0.953767  
 C -4.307542 3.115791 0.721385  
 N -2.683965 1.548470 -0.454365  
 N -3.943539 -0.321704 -0.286441  
 C -2.709463 0.168548 -0.789742  
 C -1.741732 -0.535666 -1.468240  
 C -1.464253 2.328910 -0.301830  
 C -4.608668 -1.522160 -0.770264  
 H -1.564370 2.979387 0.586461  
 H -1.249750 2.970885 -1.177835  
 H -0.611518 1.646490 -0.138826  
 H -5.697374 -1.337020 -0.808608  
 H -4.431448 -2.402837 -0.123184  
 H -4.259130 -1.750310 -1.792937  
 C -0.697734 0.132601 -2.337990  
 C -1.620375 -2.043976 -1.420882  
 C -5.570800 3.140084 1.362243  
 C -6.351845 1.978092 1.468848  
 H -7.331135 2.024662 1.966538  
 H -6.503993 -0.169695 1.061751  
 H -3.710684 4.032244 0.621081  
 H -5.945360 4.088045 1.773531  
 H -1.896417 -2.535726 -2.380835

H -2.210763 -2.512580 -0.615511  
H -0.558464 -2.317290 -1.236263  
H -0.635319 -0.406138 -3.308636  
H 0.326888 0.094033 -1.904336  
H -0.927943 1.185214 -2.575550

NHO 8:

24

Energy = 0.00 kcal/mol

C -3.035487 2.004495 0.463173  
C -4.112326 0.919400 0.449518  
N -2.241442 1.645498 -0.714448  
N -3.367336 -0.227553 -0.075833  
C -2.337683 0.251889 -0.912959  
C -1.583702 -0.489817 -1.757121  
C -0.972666 2.323337 -0.905109  
C -4.123585 -1.406948 -0.453686  
H -1.135813 3.416541 -0.876399  
H -0.548185 2.061867 -1.889403  
H -0.228335 2.056378 -0.118139  
H -4.756952 -1.721303 0.396303  
H -3.436573 -2.234682 -0.699086  
H -4.781458 -1.221965 -1.335542  
C -0.464322 -0.555130 -2.713002  
C -1.261895 -1.814129 -2.316944  
H -1.917237 -2.265223 -3.083862  
H -0.744112 -2.563083 -1.690409  
H 0.577224 -0.476306 -2.352334  
H -0.599278 -0.175529 -3.742221  
H -3.443112 3.028881 0.375177  
H -2.426580 1.946971 1.397650  
H -4.529682 0.702165 1.450440  
H -4.953116 1.203656 -0.228420

[MgCl<sub>2</sub>(THF)<sub>2</sub>]

29

Energy = 0.00 kcal/mol

Mg -0.398179 1.817296 -0.998489  
O 1.310018 2.220883 0.110600  
O -1.969209 1.899294 0.361726  
C -2.929658 2.994123 0.395753  
C -4.265260 2.370689 -0.051811  
H -2.540150 3.780750 -0.273335  
H -2.977940 3.370032 1.438838  
C -4.074521 0.838810 0.162189

H -4.463024 2.597932 -1.114517  
 H -5.107270 2.774495 0.539065  
 C -2.687481 0.715013 0.809148  
 H -4.091083 0.303421 -0.804294  
 H -4.858798 0.398714 0.804110  
 H -2.100587 -0.160208 0.481145  
 H -2.741548 0.746543 1.917777  
 C 1.962486 3.529772 0.115282  
 C 3.453730 3.263192 -0.199129  
 H 1.821611 3.977702 1.119017  
 H 1.435297 4.141373 -0.638369  
 C 3.554397 1.722910 -0.346834  
 C 2.323473 1.218345 0.403162  
 H 2.485138 1.191710 1.502096  
 H 1.924197 0.249772 0.054465  
 Cl -0.691582 3.732083 -2.255327  
 Cl -0.212619 -0.436737 -1.462409  
 H 4.093687 3.624938 0.626850  
 H 3.772856 3.782944 -1.119823  
 H 3.489425 1.422516 -1.409427  
 H 4.493755 1.314682 0.067452

## NHO Adducts

[MgCl<sub>2</sub>(THF)(NHO1)]:

36

Energy = 0.00 kcal/mol

C -3.875946 1.898906 0.268227  
 C -4.633682 0.574995 0.439840  
 N -2.530840 1.430460 -0.090646  
 N -3.853271 -0.329887 -0.415529  
 C -2.586498 0.150502 -0.576242  
 C -1.482797 -0.582152 -1.086043  
 H -0.699666 0.017997 -1.575093  
 Mg -0.438467 -1.413363 0.733332  
 O 0.667806 0.154672 1.509954  
 H -1.743942 -1.489598 -1.650530  
 C -1.473285 2.371976 -0.398381  
 C -4.225017 -1.726327 -0.546970  
 H -1.508891 3.201236 0.329987  
 H -1.571642 2.797940 -1.419990  
 H -0.489372 1.879948 -0.310906  
 H -5.323131 -1.792881 -0.641936  
 H -3.899675 -2.318536 0.333782  
 H -3.774843 -2.155921 -1.459141  
 C 2.071114 0.398940 1.151991



C 0.310446 0.913905 2.714584  
 C 2.486190 1.601186 1.996550  
 H 2.115470 0.569481 0.061561  
 H 2.650049 -0.511845 1.397576  
 C 1.640118 1.418167 3.270779  
 H -0.247114 0.235979 3.383609  
 H -0.353295 1.745424 2.405268  
 H 2.094914 0.657762 3.933917  
 H 1.517782 2.352055 3.847487  
 H 2.221832 2.547847 1.485763  
 H 3.572421 1.607134 2.194280  
 Cl 1.194598 -2.991974 0.118589  
 Cl -1.952586 -1.937082 2.468346  
 H -4.304818 2.516499 -0.551471  
 H -3.850763 2.508620 1.189240  
 H -4.609714 0.220403 1.492829  
 H -5.685182 0.624715 0.105823

[MgCl<sub>2</sub>(THF)(NHO<sub>2</sub>)]:

39

Energy = 0.00 kcal/mol

C -3.554767 2.370219 0.318735  
 C -4.850571 0.278997 0.640720  
 N -2.433171 1.565684 -0.172146  
 N -3.803610 -0.342807 -0.186543  
 C -2.598985 0.236333 -0.457982  
 C -1.512309 -0.533324 -0.995525  
 Mg -0.298736 -1.399194 0.684126  
 O 0.719867 0.135955 1.641101  
 C -1.205102 2.251751 -0.555188  
 C -4.061259 -1.728106 -0.571668  
 H -1.227138 3.269365 -0.133496  
 H -1.097927 2.334029 -1.656460  
 H -0.316586 1.727836 -0.156003  
 H -5.136594 -1.929834 -0.436758  
 H -3.485709 -2.437185 0.057930  
 H -3.813275 -1.897676 -1.635319  
 C 2.154236 0.402554 1.480752  
 C 0.193155 0.865514 2.801332  
 C 2.417752 1.633115 2.343743  
 H 2.351812 0.545465 0.404176  
 H 2.712186 -0.485673 1.833881  
 C 1.422061 1.442814 3.503502  
 H -0.390674 0.151845 3.408489  
 H -0.480893 1.658446 2.421048  
 H 1.820128 0.721068 4.242085  
 H 1.188962 2.384095 4.031876  
 H 2.192787 2.560106 1.780900

H 3.468479 1.680566 2.680119  
 Cl 1.439083 -2.731744 -0.188977  
 Cl -1.677784 -2.264704 2.400262  
 H -0.787177 0.036621 -1.594582  
 H -1.808251 -1.462212 -1.502314  
 C -4.361607 1.551313 1.318649  
 H -4.199628 2.701902 -0.525823  
 H -3.140995 3.277650 0.792362  
 H -5.226398 2.130672 1.689465  
 H -3.721633 1.303081 2.187521  
 H -5.171223 -0.460985 1.399715  
 H -5.732607 0.490670 -0.000574

[MgCl<sub>2</sub>(THF)(NHO<sub>3</sub>)]:

40

Energy = 0.00 kcal/mol

C -3.624310 1.868022 0.414332  
 C -4.389155 0.726861 0.511143  
 C -5.726670 0.504651 1.132616  
 H -6.094704 1.443162 1.580041  
 H -5.689927 -0.257440 1.937091  
 H -6.479188 0.168835 0.390523  
 C -3.886422 3.257469 0.889614  
 H -3.910128 3.985888 0.053721  
 H -3.121549 3.607940 1.612419  
 H -4.864252 3.300543 1.397957  
 N -2.451394 1.510704 -0.277958  
 N -3.670483 -0.300483 -0.125239  
 C -2.479718 0.179555 -0.596102  
 C -1.427192 -0.578765 -1.205275  
 Mg -0.083649 -1.360691 0.413783  
 O 0.276544 0.262201 1.685147  
 C -1.347377 2.389218 -0.627863  
 C -4.077046 -1.691288 -0.267504  
 H -1.528181 3.389533 -0.206458  
 H -1.249668 2.477563 -1.726182  
 H -0.400007 1.993373 -0.217896  
 H -5.073167 -1.827815 0.180333  
 H -3.353172 -2.349397 0.250315  
 H -4.127269 -1.968297 -1.337407  
 C -0.642719 0.641421 2.764455  
 C 1.601947 0.850880 1.922087  
 C 0.243383 1.262014 3.842224  
 H -1.182755 -0.269188 3.078311  
 H -1.366598 1.372203 2.351134  
 C 1.374237 1.895408 3.011630  
 H 1.968292 1.257808 0.963552

H 2.283941 0.043572 2.250657  
 H 1.042747 2.856342 2.570685  
 H 2.290779 2.083919 3.597365  
 H 0.647243 0.476951 4.510330  
 H -0.305971 1.993018 4.461140  
 Cl 2.093529 -1.890978 -0.312896  
 Cl -1.207782 -2.846456 1.882644  
 H -0.767929 0.022913 -1.853101  
 H -1.782565 -1.487252 -1.719078

[MgCl<sub>2</sub>(THF)(NHO<sub>4</sub>)]:

42

Energy = 0.00 kcal/mol

C -3.335738 1.833816 0.349984  
 C -4.058041 0.544857 0.736988  
 N -2.114254 1.310120 -0.267196  
 N -3.526790 -0.400227 -0.252628  
 C -2.290471 0.004939 -0.701892  
 C -1.311847 -0.759245 -1.416964  
 C -0.534258 -0.101936 -2.567598  
 H -0.321421 0.970211 -2.449723  
 H -1.106768 -0.211018 -3.516783  
 H 0.433687 -0.616831 -2.724181  
 Mg 0.059544 -1.322998 0.356480  
 O 0.907955 0.232358 1.428253  
 C -1.573366 -2.230081 -1.781335  
 H -2.234564 -2.338627 -2.669718  
 H -1.990382 -2.838639 -0.960912  
 H -0.610443 -2.698264 -2.066318  
 C -0.992328 2.191803 -0.498372  
 C -4.208206 -1.671647 -0.426505  
 H -0.989485 2.962814 0.292403  
 H -1.036604 2.713668 -1.477221  
 H -0.041452 1.635286 -0.434994  
 H -5.288802 -1.494326 -0.278775  
 H -3.877771 -2.431228 0.311555  
 H -4.069851 -2.060278 -1.444918  
 C 2.280392 0.715478 1.237016  
 C 0.337121 0.800555 2.656478  
 C 2.390604 1.931542 2.150805  
 H 2.413353 0.933775 0.163284  
 H 2.975939 -0.094346 1.527874  
 C 1.493657 1.532454 3.337621  
 H -0.091337 -0.031206 3.241982  
 H -0.475438 1.491710 2.358802  
 H 2.035511 0.852622 4.022137

H 1.139828 2.400022 3.921921  
 H 1.995639 2.835093 1.646869  
 H 3.436033 2.129613 2.445539  
 Cl 1.971787 -2.362690 -0.536695  
 Cl -1.244274 -2.392163 2.004557  
 H -3.802806 0.217280 1.768827  
 H -5.156340 0.616630 0.650642  
 H -3.924249 2.439395 -0.374693  
 H -3.091402 2.472230 1.217770

[MgCl<sub>2</sub>(THF)(NHO5)]:

45

Energy = 0.00 kcal/mol

C -3.500918 2.238405 0.048713  
 C -4.396939 0.117429 0.918891  
 N -2.396681 1.502568 -0.576489  
 N -3.784826 -0.338076 -0.341930  
 C -2.585511 0.150262 -0.814566  
 C -1.611295 -0.657468 -1.488573  
 Mg -0.223782 -1.138571 0.354316  
 O 0.634156 0.382450 1.484899  
 C -1.104320 2.168997 -0.611935  
 C -4.568735 -1.334569 -1.062275  
 H -0.980929 2.795573 0.291784  
 H -0.996224 2.824740 -1.499135  
 H -0.289326 1.428993 -0.635073  
 H -5.620361 -0.987773 -1.108976  
 H -4.562224 -2.327089 -0.567710  
 H -4.202621 -1.440676 -2.093141  
 C 1.983931 0.915632 1.249108  
 C 0.121927 0.856025 2.775245  
 C 2.191706 1.968074 2.336800  
 H 2.018395 1.316762 0.220306  
 H 2.696081 0.073728 1.327334  
 C 1.339006 1.425454 3.498477  
 H -0.357757 -0.003655 3.273106  
 H -0.639149 1.636930 2.575329  
 H 1.878199 0.623808 4.038392  
 H 1.056190 2.205008 4.227817  
 H 1.814727 2.954997 2.005190  
 H 3.258868 2.077950 2.598735  
 Cl 1.720411 -2.107409 -0.553709  
 Cl -1.482397 -2.228580 2.024410  
 C -0.862970 -0.100325 -2.703017  
 C -1.810486 -2.173118 -1.621081  
 C -3.898735 1.506762 1.331653  
 H -4.363327 2.295279 -0.647669

H -3.162335 3.269979 0.241889  
H -4.685116 2.047443 1.890547  
H -3.012422 1.436364 1.991414  
H -4.210282 -0.636132 1.712856  
H -5.491060 0.151989 0.748158  
H -0.864202 0.998952 -2.772202  
H -1.342168 -0.474731 -3.635067  
H 0.190447 -0.442684 -2.734676  
H -2.395460 -2.452523 -2.524571  
H -2.300095 -2.631452 -0.743676  
H -0.826182 -2.668588 -1.750199

[MgCl<sub>2</sub>(THF)(NHO<sub>6</sub>)]:

46

Energy = 0.00 kcal/mol

C -3.849534 1.677038 0.296806  
C -4.612699 0.538091 0.315728  
C -5.997402 0.324810 0.829532  
H -6.384091 1.265617 1.255933  
H -6.029651 -0.441311 1.629830  
H -6.702096 0.007009 0.034303  
C -4.164733 3.058283 0.764025  
H -4.059284 3.804642 -0.048898  
H -3.511845 3.383084 1.599696  
H -5.205590 3.102044 1.125719  
N -2.618812 1.331878 -0.282550  
N -3.846651 -0.481444 -0.277452  
C -2.598350 -0.008153 -0.630549  
C -1.445734 -0.717786 -1.166562  
C -0.680970 -0.020237 -2.308811  
H -0.410647 1.032730 -2.134562  
H -1.266703 -0.050103 -3.256838  
H 0.264341 -0.563052 -2.503965  
Mg -0.144798 -1.140293 0.645420  
O 0.847810 0.509442 1.454552  
C -1.613383 -2.197780 -1.564913  
H -2.234338 -2.332689 -2.480069  
H -2.025737 -2.846057 -0.772624  
H -0.615163 -2.606932 -1.811130  
C -1.489006 2.246212 -0.326770  
C -4.362074 -1.841866 -0.416949  
H -1.655438 3.052739 0.403936  
H -1.358985 2.702856 -1.324639  
H -0.566045 1.708268 -0.050028  
H -5.453458 -1.813931 -0.282243  
H -3.929996 -2.508895 0.350674  
H -4.157981 -2.237899 -1.420859

C 2.224901 0.870472 1.075223  
 C 0.527124 1.100700 2.753886  
 C 2.796929 1.649262 2.269048  
 H 2.182457 1.468312 0.145846  
 H 2.755140 -0.076992 0.871884  
 C 1.878927 1.247648 3.440821  
 H -0.185152 0.419595 3.250469  
 H 0.044784 2.085420 2.582665  
 H 2.192472 0.279609 3.876457  
 H 1.857706 2.003208 4.246309  
 H 2.734668 2.739410 2.089888  
 H 3.855789 1.392876 2.449389  
 Cl 1.688279 -2.513553 0.053397  
 Cl -1.532176 -1.852017 2.424957

[MgCl<sub>2</sub>(THF)(NHO7)]:

46

Energy = 0.00 kcal/mol

C -3.157430 1.990173 0.140332  
 C -3.997812 0.876204 0.361592  
 C -5.155619 0.981959 1.143263  
 C -3.453126 3.248922 0.679912  
 N -2.096427 1.547752 -0.648540  
 N -3.443975 -0.198076 -0.335785  
 C -2.243209 0.182831 -0.930616  
 C -1.290324 -0.628237 -1.614508  
 Mg 0.107741 -1.080149 0.211697  
 O 0.571489 0.565345 1.377019  
 C -0.935583 2.379858 -0.918118  
 C -4.146352 -1.471546 -0.461979  
 H -0.893572 3.178198 -0.158851  
 H -0.983066 2.850988 -1.916946  
 H -0.013171 1.781192 -0.842697  
 H -5.215367 -1.290752 -0.262813  
 H -3.767121 -2.214471 0.262942  
 H -4.056428 -1.860137 -1.485980  
 C 1.900337 1.192314 1.418853  
 C -0.230944 1.001880 2.530135  
 C 1.759372 2.331909 2.422935  
 H 2.154955 1.512197 0.393394  
 H 2.630576 0.429309 1.748271  
 C 0.742928 1.761430 3.429258  
 H -0.672690 0.099608 2.987190  
 H -1.042166 1.652858 2.148118  
 H 1.241095 1.067484 4.132623  
 H 0.233201 2.543476 4.019128  
 H 1.357442 3.239071 1.931014

H 2.727349 2.591324 2.886624  
 Cl 2.175821 -1.745311 -0.661811  
 Cl -1.086717 -2.411891 1.743596  
 C -0.529101 -0.054035 -2.816741  
 C -1.541099 -2.124346 -1.856557  
 C -4.618212 3.357445 1.465936  
 C -5.453023 2.245224 1.692953  
 H -6.354004 2.360239 2.311264  
 H -5.806607 0.119007 1.332398  
 H -2.815345 4.122841 0.495729  
 H -4.878151 4.330158 1.905755  
 H -2.216361 -2.303933 -2.721863  
 H -1.933154 -2.674201 -0.985389  
 H -0.578495 -2.601693 -2.128298  
 H -1.085274 -0.295908 -3.749915  
 H 0.468524 -0.524965 -2.908137  
 H -0.382019 1.034774 -2.814648

[MgCl<sub>2</sub>(THF)(NHO<sub>8</sub>)]:

40

Energy = 0.00 kcal/mol

C -3.697241 2.161408 -0.446843  
 C -4.639312 1.000150 -0.811229  
 N -2.375181 1.621972 -0.795032  
 N -3.721556 -0.144336 -0.860371  
 C -2.427177 0.266041 -0.940315  
 C -1.297005 -0.600344 -1.072756  
 Mg -0.666178 -1.565286 0.818047  
 O -1.341115 -0.476183 2.454673  
 C -1.185075 2.392494 -0.489092  
 C -4.203084 -1.489270 -1.113291  
 H -1.191506 3.339454 -1.060557  
 H -0.286965 1.816335 -0.755671  
 H -1.143967 2.637811 0.593426  
 H -4.465915 -1.641090 -2.180739  
 H -5.108714 -1.661860 -0.504158  
 H -3.436347 -2.223157 -0.813351  
 C -2.774291 -0.414847 2.751810  
 C -0.562915 -0.376211 3.698809  
 C -2.879537 -0.609309 4.261917  
 H -3.273318 -1.204871 2.162149  
 H -3.144120 0.580653 2.435292  
 C -1.574654 0.033083 4.768106  
 H 0.246387 0.354694 3.529870  
 H -0.117100 -1.368290 3.904407  
 H -1.673371 1.135081 4.812223  
 H -1.278737 -0.326130 5.769597

H -2.905769 -1.688028 4.507467  
 H -3.786441 -0.135189 4.677223  
 Cl 1.675134 -1.588131 1.058675  
 Cl -1.820054 -3.614214 1.116462  
 C -0.198125 -0.344939 -2.087309  
 C -1.128798 -1.528528 -2.265327  
 H -1.851566 -1.468669 -3.093512  
 H -0.736915 -2.542994 -2.096193  
 H 0.843966 -0.533554 -1.789347  
 H -0.318019 0.481409 -2.805392  
 H -3.908678 3.087108 -1.011709  
 H -3.732162 2.406156 0.637381  
 H -5.436970 0.835696 -0.064208  
 H -5.118739 1.147792 -1.802207

[ZnCl<sub>2</sub>(THF)<sub>2</sub>]:

29

Energy = 0.00 kcal/mol

Zn -0.691732 -1.327596 1.020063  
 O 0.381527 0.339457 1.539425  
 C 0.161896 1.113178 2.767634  
 C 1.718634 0.603657 0.992752  
 C 1.545830 1.629432 3.151065  
 H -0.302361 0.441244 3.509445  
 H -0.541241 1.934977 2.527649  
 C 2.229792 1.807389 1.781947  
 H 1.606661 0.783470 -0.091235  
 H 2.335666 -0.301339 1.150790  
 H 1.906411 2.752682 1.304950  
 H 3.332156 1.813862 1.849067  
 H 2.083525 0.878345 3.761266  
 H 1.488721 2.569030 3.728793  
 Cl 0.704814 -2.915308 0.269401  
 Cl -2.301999 -1.584539 2.567739  
 H -1.799257 1.537924 -0.417372  
 H -4.263758 1.136050 -1.677341  
 H -3.078528 0.528778 0.362266  
 C -2.451060 0.654939 -0.541403  
 H -2.746228 1.222835 -2.625260  
 C -3.275755 0.666107 -1.828375  
 O -1.584268 -0.523494 -0.655243  
 C -3.370239 -0.829655 -2.183889  
 H -4.152004 -1.325997 -1.577298  
 H -3.595424 -1.004240 -3.250996  
 C -1.987812 -1.348922 -1.799342



H -1.241590 -1.198044 -2.603753  
H -1.968458 -2.405465 -1.480908

[ZnCl<sub>2</sub>(THF)(NHO1)]:

36

Energy = 0.00 kcal/mol

C -3.838534 1.913864 0.243498  
C -4.605380 0.602648 0.477689  
N -2.505617 1.423002 -0.134853  
N -3.823381 -0.355067 -0.318578  
C -2.573605 0.125262 -0.539369  
C -1.470282 -0.635827 -1.053818  
H -0.746871 -0.036465 -1.628919  
Zn -0.402892 -1.413930 0.562076  
O 0.670179 0.222622 1.419554  
H -1.782988 -1.529610 -1.615826  
C -1.431968 2.338057 -0.470865  
C -4.210205 -1.752622 -0.391757  
H -1.463868 3.194516 0.224883  
H -1.522327 2.725561 -1.507638  
H -0.457084 1.834470 -0.355461  
H -5.307185 -1.809186 -0.504610  
H -3.904842 -2.303928 0.520996  
H -3.747622 -2.229657 -1.272864  
C 2.110975 0.385831 1.227763  
C 0.240767 0.900212 2.645549  
C 2.486677 1.564601 2.121187  
H 2.286745 0.549332 0.149892  
H 2.615943 -0.550941 1.534117  
C 1.528778 1.385092 3.314342  
H -0.342814 0.178625 3.243519  
H -0.417524 1.740793 2.348502  
H 1.917788 0.616370 4.009332  
H 1.370437 2.316907 3.886056  
H 2.293034 2.524309 1.603052  
H 3.551549 1.538205 2.413577  
Cl 1.291299 -2.844478 -0.035638  
Cl -1.687773 -2.079955 2.363842  
H -4.278077 2.509822 -0.585415  
H -3.783858 2.552481 1.143011  
H -4.596117 0.301664 1.547087  
H -5.652867 0.640434 0.130075

[ZnCl<sub>2</sub>(THF)(NHO2)]:

39

Energy = 0.00 kcal/mol

C -3.449147 2.343482 0.447779  
C -4.816834 0.281480 0.640629  
N -2.395437 1.538144 -0.179999  
N -3.783563 -0.356535 -0.191013  
C -2.584265 0.218949 -0.464320  
C -1.492772 -0.570663 -1.006441  
Zn -0.407111 -1.358520 0.586920  
O 0.648412 0.240571 1.557323  
C -1.166348 2.214825 -0.591089  
C -4.071113 -1.732460 -0.594922  
H -1.209913 3.257420 -0.238799  
H -1.056170 2.228040 -1.693326  
H -0.276716 1.728384 -0.149399  
H -5.158746 -1.893511 -0.512209  
H -3.550051 -2.462177 0.056736  
H -3.782804 -1.905959 -1.646600  
C 2.097667 0.401441 1.478454  
C 0.132679 0.913026 2.752248  
C 2.379620 1.652648 2.303544  
H 2.365085 0.475922 0.410331  
H 2.582387 -0.497632 1.908249  
C 1.358994 1.513657 3.449567  
H -0.412133 0.166038 3.355841  
H -0.579827 1.689376 2.410226  
H 1.742891 0.820038 4.221687  
H 1.123994 2.474918 3.940127  
H 2.181582 2.564314 1.705924  
H 3.425043 1.691369 2.658115  
Cl 1.333990 -2.737217 -0.011369  
Cl -1.710115 -2.112438 2.345541  
H -0.785618 0.001836 -1.623984  
H -1.822324 -1.469377 -1.546488  
C -4.257583 1.473858 1.401355  
H -4.106033 2.796589 -0.326662  
H -2.962145 3.173108 0.990543  
H -5.084295 2.055413 1.846930  
H -3.604624 1.123364 2.224217  
H -5.196298 -0.480682 1.347377  
H -5.668687 0.584631 -0.004604

[ZnCl<sub>2</sub>(THF)(NHO<sub>3</sub>)]:

40

Energy = 0.00 kcal/mol

C -3.678582 1.954600 0.378699  
C -4.313366 0.786482 0.744524  
C -5.567665 0.566955 1.521136  
H -6.000529 1.536715 1.819129

H -5.387826 -0.016960 2.446236  
 H -6.332211 0.025974 0.928001  
 C -4.042557 3.378735 0.634084  
 H -4.196962 3.941481 -0.308620  
 H -3.266031 3.913145 1.217737  
 H -4.982401 3.428686 1.209063  
 N -2.542635 1.580771 -0.359604  
 N -3.549034 -0.269887 0.222202  
 C -2.472377 0.222169 -0.452948  
 C -1.419613 -0.542626 -1.082746  
 Zn 0.111861 -1.018004 0.230649  
 O 0.409717 0.695709 1.495483  
 C -1.547028 2.472321 -0.937076  
 C -3.821414 -1.695653 0.363390  
 H -1.797096 3.512890 -0.682406  
 H -1.526287 2.369968 -2.037778  
 H -0.547033 2.230942 -0.533026  
 H -4.664699 -1.837344 1.055799  
 H -2.928676 -2.205459 0.772251  
 H -4.084577 -2.138693 -0.615459  
 C 1.710931 1.352470 1.624220  
 C -0.365985 0.864365 2.725923  
 C 1.551003 2.300333 2.809838  
 H 1.930049 1.849198 0.662826  
 H 2.480933 0.578461 1.808393  
 C 0.591740 1.516435 3.725065  
 H -0.730678 -0.132079 3.032909  
 H -1.230785 1.517082 2.489280  
 H 1.145071 0.742223 4.290725  
 H 0.060606 2.158457 4.450205  
 H 1.092812 3.256022 2.487390  
 H 2.519403 2.526918 3.290583  
 Cl 2.200445 -1.253871 -0.706319  
 Cl -0.419997 -2.615619 1.828564  
 H -0.941431 0.013232 -1.907018  
 H -1.781302 -1.518710 -1.448837

[ZnCl<sub>2</sub>(THF)(NHO<sub>4</sub>)]:

42

Energy = 0.00 kcal/mol

C -3.479405 1.863028 0.111233  
 C -4.200534 0.587334 0.534628  
 N -2.205588 1.334357 -0.389608  
 N -3.537588 -0.435776 -0.291405  
 C -2.307390 0.002993 -0.708164  
 C -1.257248 -0.776239 -1.354927  
 C -0.516328 -0.086744 -2.521507  
 H -0.186148 0.945924 -2.343407

H -1.164074 -0.073387 -3.425872  
 H 0.386489 -0.672869 -2.775567  
 Zn 0.072559 -1.242863 0.235944  
 O 0.915818 0.395606 1.311173  
 C -1.603668 -2.202290 -1.835706  
 H -2.367617 -2.192273 -2.643644  
 H -1.934857 -2.891136 -1.042835  
 H -0.689136 -2.645341 -2.270784  
 C -1.093381 2.244301 -0.580145  
 C -4.035443 -1.802797 -0.152955  
 H -1.189326 3.054303 0.164628  
 H -1.084067 2.711218 -1.585739  
 H -0.135724 1.729185 -0.400792  
 H -5.068443 -1.733715 0.227195  
 H -3.431601 -2.381597 0.572759  
 H -4.071221 -2.325622 -1.119897  
 C 2.344294 0.714531 1.258571  
 C 0.332874 0.882367 2.565041  
 C 2.533725 1.798994 2.314991  
 H 2.577323 1.029853 0.226549  
 H 2.917611 -0.203745 1.489456  
 C 1.516385 1.383475 3.394245  
 H -0.224685 0.045439 3.020462  
 H -0.371581 1.699372 2.310865  
 H 1.926150 0.565955 4.017917  
 H 1.229064 2.215297 4.061878  
 H 2.279913 2.794353 1.900793  
 H 3.572479 1.833860 2.689194  
 Cl 1.978175 -2.250686 -0.569574  
 Cl -0.972647 -2.355979 1.982799  
 H -4.051458 0.358677 1.612188  
 H -5.284366 0.607232 0.326497  
 H -4.021456 2.402671 -0.695127  
 H -3.308018 2.566057 0.945758

[ZnCl<sub>2</sub>(THF)(NHO<sub>5</sub>)]:

45

Energy = 0.00 kcal/mol

C -4.519315 0.947006 0.126344  
 C -5.084615 -1.402394 -0.233672  
 N -3.112882 0.644550 -0.176477  
 N -3.941084 -1.268320 -1.162740  
 C -2.844206 -0.490144 -0.890837  
 C -1.475151 -0.851302 -1.291777  
 Zn -0.647191 -1.494970 0.592973  
 O 0.893950 -0.045781 1.129298  
 C -2.129848 1.438615 0.549439

C -4.145487 -1.961850 -2.433709  
 H -2.480819 1.595704 1.585420  
 H -1.987717 2.427322 0.069820  
 H -1.157300 0.929838 0.593522  
 H -5.165073 -1.723937 -2.795120  
 H -4.068365 -3.062592 -2.335920  
 H -3.433434 -1.610976 -3.191454  
 C 1.079500 0.319388 2.525710  
 C 2.228944 -0.234480 0.569721  
 C 2.221331 -0.580557 2.995425  
 H 0.116352 0.152229 3.036593  
 H 1.351763 1.395199 2.570403  
 C 3.129099 -0.689999 1.741551  
 H 2.558091 0.733452 0.143003  
 H 2.141152 -0.983366 -0.234602  
 H 4.014579 -0.034055 1.826530  
 H 3.484118 -1.724663 1.592787  
 H 1.819418 -1.572305 3.273543  
 H 2.748336 -0.159912 3.870531  
 Cl 0.688173 -3.375093 0.498673  
 Cl -1.970531 -1.545734 2.482046  
 C -0.638517 0.267168 -1.940730  
 C -1.264507 -2.151783 -2.090234  
 C -5.127974 -0.280401 0.802441  
 H -5.059421 1.187633 -0.812571  
 H -4.546128 1.841805 0.769153  
 H -6.168475 -0.100431 1.129811  
 H -4.520608 -0.534828 1.691075  
 H -5.040268 -2.402715 0.245439  
 H -6.003376 -1.376873 -0.851879  
 H -0.616098 1.222127 -1.392234  
 H -1.021772 0.485074 -2.961589  
 H 0.410392 -0.063877 -2.060118  
 H -1.474092 -2.027584 -3.174067  
 H -1.862123 -2.998214 -1.711679  
 H -0.206317 -2.458459 -2.011800

[ZnCl<sub>2</sub>(THF)(NHO<sub>6</sub>):

46

Energy = 0.00 kcal/mol

C -3.783436 1.666606 0.277627  
 C -4.553818 0.530514 0.300348  
 C -5.958416 0.343456 0.768815  
 H -6.362990 1.309520 1.114574  
 H -6.029328 -0.366855 1.616866  
 H -6.623733 -0.026495 -0.037022

C -4.103135 3.060210 0.704224  
 H -3.945444 3.787318 -0.117089  
 H -3.487393 3.390106 1.565575  
 H -5.159799 3.126007 1.012875  
 N -2.543251 1.303012 -0.263282  
 N -3.773400 -0.503752 -0.242871  
 C -2.527771 -0.034699 -0.591870  
 C -1.367278 -0.768712 -1.132625  
 C -0.599840 -0.027092 -2.252109  
 H -0.208515 0.967688 -1.992492  
 H -1.237168 0.092247 -3.156869  
 H 0.272694 -0.639565 -2.546854  
 Zn -0.147394 -1.197837 0.523016  
 O 0.868971 0.497924 1.389733  
 C -1.636117 -2.193170 -1.670696  
 H -2.316006 -2.187897 -2.551731  
 H -2.029222 -2.902582 -0.925338  
 H -0.672744 -2.612369 -2.012818  
 C -1.415725 2.226247 -0.311494  
 C -4.257370 -1.884458 -0.288239  
 H -1.599727 3.041081 0.405227  
 H -1.290003 2.667341 -1.316077  
 H -0.493420 1.701812 -0.012996  
 H -5.315959 -1.886245 0.007265  
 H -3.692041 -2.510792 0.423722  
 H -4.186615 -2.297829 -1.304413  
 C 2.283264 0.759197 1.092813  
 C 0.531620 1.010859 2.718655  
 C 2.781409 1.643463 2.237574  
 H 2.339016 1.238556 0.098124  
 H 2.798598 -0.218202 1.049659  
 C 1.875494 1.220805 3.409554  
 H -0.129374 0.268033 3.197478  
 H -0.017474 1.966993 2.590650  
 H 2.229614 0.270916 3.854748  
 H 1.818907 1.980499 4.209604  
 H 2.633529 2.714918 1.999823  
 H 3.855237 1.482743 2.440827  
 Cl 1.666616 -2.535811 0.009014  
 Cl -1.394613 -1.939930 2.339997

[ZnCl<sub>2</sub>(THF)(NHO7)]:

46

Energy = 0.00 kcal/mol

C -3.181009 1.988276 0.117140  
 C -4.028900 0.880947 0.330684

C -5.208608 1.000754 1.078763  
 C -3.483891 3.256562 0.632250  
 N -2.099248 1.528744 -0.630837  
 N -3.447014 -0.208112 -0.322859  
 C -2.239610 0.169259 -0.888470  
 C -1.241398 -0.659115 -1.539899  
 Zn 0.136783 -1.008886 0.075000  
 O 0.578253 0.654218 1.328401  
 C -0.954208 2.378775 -0.924988  
 C -4.116967 -1.508313 -0.367468  
 H -0.959036 3.220524 -0.214740  
 H -1.002357 2.787500 -1.949677  
 H -0.017993 1.816672 -0.785137  
 H -5.167945 -1.353873 -0.076855  
 H -3.652565 -2.219603 0.337535  
 H -4.107533 -1.919988 -1.385959  
 C 1.930167 1.203240 1.437066  
 C -0.199268 0.981542 2.529105  
 C 1.800857 2.315203 2.471826  
 H 2.236074 1.536687 0.430230  
 H 2.617042 0.399143 1.766792  
 C 0.771140 1.723544 3.453187  
 H -0.592267 0.037409 2.945881  
 H -1.048152 1.618676 2.210836  
 H 1.264991 1.015033 4.144954  
 H 0.258050 2.491399 4.059248  
 H 1.410947 3.239579 2.002055  
 H 2.768387 2.549715 2.949946  
 Cl 2.220690 -1.547949 -0.702111  
 Cl -0.828751 -2.404564 1.650046  
 C -0.555184 -0.061032 -2.784442  
 C -1.587715 -2.124685 -1.870489  
 C -4.665602 3.377654 1.385363  
 C -5.511524 2.269830 1.605195  
 H -6.422684 2.395611 2.205948  
 H -5.868861 0.144520 1.264019  
 H -2.832056 4.122376 0.461082  
 H -4.930060 4.355022 1.811657  
 H -2.314861 -2.202396 -2.707214  
 H -1.954708 -2.710910 -1.014187  
 H -0.663278 -2.623869 -2.216953  
 H -1.258136 -0.084935 -3.645877  
 H 0.317912 -0.684075 -3.051377  
 H -0.190121 0.970886 -2.688927

[ZnCl<sub>2</sub>(THF)(NHO8)]:

40

Energy = 0.00 kcal/mol

C -3.614706 2.046655 -0.419973  
C -4.498516 0.782875 -0.429113  
N -2.257971 1.487602 -0.489520  
N -3.564787 -0.263404 -0.871364  
C -2.282679 0.176027 -0.824898  
C -1.113556 -0.646502 -1.022631  
Zn -0.395251 -1.403039 0.748110  
O -1.798601 -0.870098 2.293640  
C -1.083501 2.335220 -0.420350  
C -3.991288 -1.649240 -0.914956  
H -1.200847 3.044334 0.419607  
H -0.945383 2.921052 -1.352226  
H -0.189106 1.718161 -0.238949  
H -4.494306 -1.920067 0.035652  
H -3.119699 -2.306046 -1.052879  
H -4.707098 -1.810005 -1.743546  
C -1.548739 0.290525 3.151794  
C -2.585313 -1.870668 3.015833  
C -2.429484 0.080594 4.384237  
H -1.798000 1.198395 2.572328  
H -0.469378 0.306310 3.394234  
C -2.507057 -1.454458 4.482629  
H -2.150433 -2.859716 2.789805  
H -3.625623 -1.831161 2.632231  
H -1.591144 -1.862683 4.951788  
H -3.379607 -1.806783 5.061205  
H -3.437965 0.509321 4.224165  
H -1.994931 0.551921 5.283710  
Cl 1.531581 -0.389624 1.517071  
Cl -0.375950 -3.701490 0.901704  
C -0.090057 -0.293871 -2.091324  
C -0.972988 -1.510420 -2.265191  
H -1.750352 -1.448942 -3.042007  
H -0.530310 -2.509808 -2.149254  
H 0.973669 -0.435696 -1.853624  
H -0.291656 0.561941 -2.753119  
H -3.802380 2.696848 -1.299383  
H -3.741074 2.658691 0.491691  
H -4.888192 0.531768 0.579894  
H -5.358532 0.860755 -1.118590

[LiCl(THF)<sub>3</sub>]:

41

Energy = 0.00 kcal/mol

Li -1.269852 -1.245147 1.019936



O -0.084455 0.285768 1.458545  
 C 1.132238 0.497282 0.681702  
 C 0.087207 0.853003 2.776727  
 C 2.196048 1.021066 1.669486  
 H 0.916904 1.222989 -0.127417  
 H 1.390207 -0.477078 0.226029  
 C 1.584705 0.731158 3.056667  
 H -0.560440 0.284079 3.467075  
 H -0.238369 1.916655 2.771556  
 H 1.826626 -0.297342 3.388160  
 H 1.930746 1.436471 3.833720  
 H 2.347715 2.109148 1.536885  
 H 3.172267 0.524890 1.524307  
 Cl -0.206984 -2.796026 -0.322503  
 O -1.816369 -2.028582 2.787345  
 H -2.254885 1.422031 0.306148  
 H -3.891525 1.881794 -1.879822  
 H -4.039515 1.232739 0.490906  
 C -3.143068 0.880529 -0.064776  
 H -2.378807 0.942899 -2.098747  
 C -3.354724 0.964756 -1.576105  
 O -2.932642 -0.526471 0.199315  
 C -4.158061 -0.321262 -1.858014  
 H -5.238671 -0.140482 -1.701342  
 H -4.022760 -0.691838 -2.889740  
 C -3.618840 -1.319308 -0.814484  
 H -2.873276 -2.025400 -1.227323  
 H -4.428897 -1.896840 -0.326206  
 C -0.880828 -2.935377 3.419145  
 C -3.119637 -2.631863 2.937791  
 C -2.889655 -4.130141 2.690964  
 H -3.796007 -2.142044 2.216394  
 H -3.492757 -2.442935 3.968614  
 C -1.428947 -4.359859 3.172814  
 H -2.979555 -4.354984 1.612665  
 H -3.622449 -4.753943 3.233888  
 H -0.835079 -2.700142 4.503697  
 H 0.109111 -2.754555 2.966139  
 H -0.836451 -4.880053 2.399873  
 H -1.389317 -4.962964 4.098257

[LiCl(THF)2(NHO1)]:

48

Energy = 0.00 kcal/mol

C -3.817733 1.822295 0.366624  
 C -4.454470 0.460435 0.663232

N -2.516504 1.425754 -0.173523  
 N -3.835831 -0.379732 -0.369273  
 C -2.590137 0.142263 -0.693437  
 C -1.587770 -0.516705 -1.383419  
 H -0.723520 0.038121 -1.763791  
 Li -0.473862 -1.114405 0.636765  
 O 0.887907 0.312071 0.960988  
 H -1.783900 -1.507647 -1.805562  
 C -1.594338 2.418198 -0.680524  
 C -4.086974 -1.808550 -0.372322  
 H -1.614096 3.300571 -0.016540  
 H -1.847902 2.749815 -1.713725  
 H -0.564890 2.017240 -0.678863  
 H -5.160681 -1.980929 -0.178663  
 H -3.490654 -2.332041 0.407240  
 H -3.849724 -2.236479 -1.363793  
 C 2.214059 0.300898 0.364902  
 C 0.931239 1.002849 2.234606  
 C 3.163625 0.932503 1.401770  
 H 2.187057 0.867193 -0.587343  
 H 2.465733 -0.753097 0.138972  
 C 2.369355 0.828712 2.719454  
 H 0.160712 0.537870 2.875937  
 H 0.685173 2.076240 2.080226  
 H 2.498186 -0.169837 3.180717  
 H 2.662719 1.593705 3.460631  
 H 3.358392 1.993958 1.155374  
 H 4.137172 0.411688 1.442235  
 O 0.633115 -2.732394 0.217467  
 Cl -1.711308 -1.519603 2.566687  
 H -4.411841 2.392062 -0.386010  
 H -3.701024 2.451578 1.268439  
 H -4.176203 0.100392 1.678915  
 H -5.555472 0.462595 0.565159  
 C 0.436966 -3.612510 -0.923219  
 C 1.071014 -3.504259 1.368586  
 C 0.846297 -5.017705 -0.456958  
 H 1.045631 -3.238463 -1.768980  
 H -0.632032 -3.566917 -1.211566  
 C 0.647692 -4.940909 1.068696  
 H 1.909938 -5.211987 -0.695591  
 H 0.239168 -5.806293 -0.936806  
 H 0.582428 -3.066440 2.258478  
 H 2.175055 -3.418314 1.463373  
 H 1.251154 -5.682699 1.622012  
 H -0.417095 -5.087033 1.336186

[LiCl(THF)2(NHO2)]:

51

Energy = 0.00 kcal/mol

N -2.714799 1.479865 -0.439159  
N -3.884834 -0.552010 -0.470285  
C -2.711573 0.133980 -0.754678  
C -1.607192 -0.484194 -1.346612  
H -0.823582 0.118663 -1.816955  
Li -0.508140 -0.988531 0.676179  
O 0.730879 0.511005 1.163489  
H -1.670852 -1.532189 -1.651723  
C -1.583608 2.313195 -0.798438  
C -4.019654 -1.933725 -0.896775  
H -1.726560 3.316488 -0.363579  
H -1.472877 2.424849 -1.900134  
H -0.642716 1.888949 -0.395212  
H -5.079958 -2.228473 -0.796350  
H -3.406181 -2.628540 -0.280113  
H -3.729732 -2.042454 -1.957655  
C 2.015555 0.715500 0.518292  
C 0.760776 1.082529 2.493233  
C 2.964619 1.276824 1.598462  
H 1.887360 1.414083 -0.333075  
H 2.340061 -0.264487 0.119343  
C 2.224233 0.981647 2.919745  
H 0.050170 0.499282 3.105816  
H 0.426596 2.142568 2.448920  
H 2.445606 -0.042439 3.278362  
H 2.482197 1.693132 3.724801  
H 3.095769 2.367983 1.468863  
H 3.964894 0.810524 1.553113  
O 0.831675 -2.415795 0.255313  
Cl -1.767221 -1.584888 2.529619  
C 1.519584 -2.998857 1.398276  
C 0.839348 -3.341773 -0.859044  
C 1.822214 -4.450243 1.009923  
H 0.857533 -2.898366 2.278642  
H 2.449314 -2.418361 1.574277  
C 1.922139 -4.370316 -0.525006  
H 0.986070 -5.111981 1.308273  
H 2.745260 -4.826551 1.486768  
H 1.036102 -2.765708 -1.782058  
H -0.160464 -3.818881 -0.941196  
H 1.748968 -5.340576 -1.024382  
H 2.918346 -3.995969 -0.832769  
C -4.760413 -0.199318 0.661791  
C -4.442736 1.181945 1.233343  
H -4.654405 -0.969772 1.455082

H -5.808693 -0.238516 0.296711  
 C -3.925119 2.079213 0.110839  
 H -3.654976 1.098114 2.006089  
 H -5.345754 1.611944 1.705518  
 H -3.669045 3.083930 0.490824  
 H -4.708070 2.210667 -0.673075

[LiCl(THF)<sub>2</sub>(NHO<sub>3</sub>)]:

52

Energy = 0.00 kcal/mol

C -3.738446 1.664366 0.673305  
 C -4.473609 0.504505 0.641227  
 N -2.597272 1.449843 -0.128914  
 N -3.784077 -0.400992 -0.188048  
 C -2.610398 0.166120 -0.641127  
 C -1.607078 -0.457945 -1.393919  
 H -0.840893 0.170735 -1.864390  
 Li -0.363348 -1.248295 0.413055  
 O 0.938677 0.185907 0.955012  
 H -1.857059 -1.394258 -1.907844  
 C -1.529694 2.388399 -0.400483  
 C -4.124192 -1.784339 -0.442085  
 H -1.702633 3.319975 0.160720  
 H -1.480200 2.630123 -1.481593  
 H -0.555338 1.959639 -0.093468  
 H -5.106934 -2.011972 -0.000789  
 H -3.363830 -2.450050 0.014888  
 H -4.174179 -1.976824 -1.532358  
 C 2.222093 0.476414 0.337127  
 C 0.892947 0.776852 2.277399  
 C 3.078929 1.169130 1.416808  
 H 2.059268 1.117321 -0.552306  
 H 2.655845 -0.484258 -0.001394  
 C 2.350249 0.818164 2.730220  
 H 0.222479 0.144546 2.886201  
 H 0.466677 1.802305 2.208097  
 H 2.661371 -0.177281 3.102633  
 H 2.525248 1.557915 3.532170  
 H 3.084305 2.265507 1.263567  
 H 4.127451 0.822040 1.399740  
 O 0.806037 -2.820804 -0.116539  
 Cl -1.552609 -1.991451 2.264578  
 C 0.103264 -3.924333 -0.757807  
 C 1.616809 -3.327481 0.979615  
 C 0.655687 -5.207827 -0.125893  
 H 0.275117 -3.857825 -1.848704  
 H -0.980548 -3.804967 -0.554775

C 1.081514 -4.728474 1.274023  
 H 1.531406 -5.578809 -0.693753  
 H -0.099288 -6.014386 -0.096997  
 H 1.509207 -2.628387 1.828732  
 H 2.678981 -3.352281 0.655312  
 H 1.838683 -5.380304 1.746341  
 H 0.203401 -4.655814 1.943986  
 C -3.989249 2.951685 1.384177  
 C -5.752463 0.146903 1.320080  
 H -4.086230 3.809926 0.686767  
 H -3.178781 3.200768 2.100691  
 H -4.928312 2.884897 1.960075  
 H -6.553360 -0.118556 0.598845  
 H -6.113719 0.999918 1.919522  
 H -5.627157 -0.715649 2.006943

[LiCl(THF)<sub>2</sub>(NHO<sub>4</sub>)]:

54

Energy = 0.00 kcal/mol

C -3.383462 1.691341 0.607517  
 C -4.160174 0.387770 0.705523  
 N -2.218863 1.331164 -0.218075  
 N -3.805413 -0.298411 -0.552012  
 C -2.523039 0.152845 -0.949129  
 C -1.704454 -0.440558 -1.891161  
 C -0.267156 -0.017495 -2.119168  
 Li -0.474731 -1.179046 0.637980  
 O 0.906071 0.141730 1.133045  
 C -2.232002 -1.427155 -2.917713  
 C -1.657602 2.492816 -0.904980  
 C -4.121158 -1.726712 -0.514142  
 H -1.472232 3.285581 -0.157184  
 H -2.361563 2.895320 -1.670793  
 H -0.700778 2.266519 -1.395260  
 H -5.127309 -1.841929 -0.072285  
 H -3.396192 -2.282520 0.121523  
 H -4.148412 -2.173405 -1.518742  
 C 2.300115 0.232461 0.729280  
 C 0.682562 0.950129 2.318837  
 C 2.994330 1.123481 1.774038  
 H 2.352413 0.649787 -0.295125  
 H 2.715505 -0.793322 0.707870  
 C 2.051273 1.035317 2.989871  
 H -0.098111 0.439994 2.911456  
 H 0.315126 1.952096 2.010842  
 H 2.247115 0.115520 3.574829

H 2.138008 1.903104 3.668398  
 H 3.057482 2.167808 1.412773  
 H 4.020149 0.777302 1.993776  
 O 0.533721 -2.772502 0.024538  
 Cl -1.707700 -1.834361 2.461676  
 H -3.986909 2.474633 0.091470  
 H -3.074239 2.090660 1.591479  
 H -3.811882 -0.215402 1.573198  
 H -5.253169 0.537017 0.781741  
 C -0.164687 -3.844480 -0.669114  
 C 1.390324 -3.330446 1.060444  
 C 0.466330 -5.149793 -0.173435  
 H -0.050062 -3.683612 -1.757109  
 H -1.240537 -3.783562 -0.406069  
 C 0.923732 -4.773663 1.247913  
 H 1.336657 -5.424396 -0.800879  
 H -0.249193 -5.991364 -0.191988  
 H 1.274358 -2.709642 1.967382  
 H 2.443369 -3.280595 0.711365  
 H 1.725916 -5.427586 1.634734  
 H 0.070725 -4.805326 1.952812  
 H 0.350383 -0.908042 -2.355717  
 H 0.190511 0.461680 -1.236347  
 H -0.143307 0.679030 -2.979972  
 H -1.672399 -1.293546 -3.865269  
 H -3.299008 -1.260759 -3.156371  
 H -2.115276 -2.496424 -2.637177

[LiCl(THF)2(NHO5)]:

57

Energy = 0.00 kcal/mol

N -3.017873 1.467183 -0.342322  
 N -3.840594 -0.659981 -0.945903  
 C -2.773559 0.238298 -0.997239  
 C -1.610580 0.013491 -1.725558  
 C -0.785614 1.161484 -2.266557  
 Li -0.436673 -1.033458 0.632756  
 O 1.150420 0.136379 0.647517  
 C -1.191606 -1.357760 -2.209128  
 C -1.977934 2.060742 0.498775  
 C -4.208350 -1.475441 -2.089246  
 H -2.073850 1.737392 1.558536  
 H -2.039113 3.165514 0.454635  
 H -0.981022 1.756194 0.149607  
 H -5.307805 -1.426807 -2.238182  
 H -3.941507 -2.549696 -1.977410

H -3.715634 -1.087229 -2.995942  
 C 2.364243 -0.079926 -0.127365  
 C 1.456784 0.928937 1.826107  
 C 3.510494 0.562607 0.674468  
 H 2.235935 0.374896 -1.128510  
 H 2.490813 -1.172607 -0.252448  
 C 2.933973 0.657649 2.100976  
 H 0.762325 0.604953 2.621712  
 H 1.278631 2.002246 1.600620  
 H 3.054168 -0.302322 2.639960  
 H 3.404737 1.454504 2.704174  
 H 3.735788 1.573693 0.284918  
 H 4.437936 -0.035046 0.621312  
 O 0.359255 -2.870917 0.461527  
 Cl -1.580213 -1.071859 2.616088  
 C -0.476000 -4.018219 0.135309  
 C 1.219204 -3.195076 1.591878  
 C 0.070199 -5.187119 0.960734  
 H -0.421388 -4.185418 -0.956146  
 H -1.522392 -3.777162 0.414723  
 C 0.641538 -4.473497 2.198829  
 H 0.874442 -5.710721 0.407862  
 H -0.714819 -5.924691 1.205990  
 H 1.203756 -2.336300 2.287040  
 H 2.252144 -3.348089 1.215098  
 H 1.405574 -5.068322 2.730938  
 H -0.167955 -4.219799 2.909960  
 C -4.682133 -0.823324 0.245794  
 C -4.687865 0.442905 1.117535  
 H -4.361211 -1.708005 0.840313  
 H -5.709892 -1.033086 -0.116624  
 C -4.370918 1.631107 0.203788  
 H -3.904742 0.368456 1.896771  
 H -5.664407 0.554900 1.627183  
 H -4.408633 2.592725 0.747020  
 H -5.104860 1.692534 -0.625977  
 H -0.561546 0.993215 -3.342568  
 H 0.200128 1.285283 -1.765392  
 H -1.319505 2.126636 -2.185727  
 H -0.103881 -1.522310 -2.048946  
 H -1.350122 -1.504173 -3.302751  
 H -1.724985 -2.173139 -1.691452

[LiCl(THF)<sub>2</sub>(NHO<sub>6</sub>)]:

58

Energy = 0.00 kcal/mol

C -3.415738 1.655444 0.720391

C -4.194855 0.533759 0.805646  
 N -2.423865 1.406321 -0.257016  
 N -3.687898 -0.409548 -0.111462  
 C -2.553283 0.104001 -0.755323  
 C -1.710595 -0.574240 -1.654202  
 C -0.369220 -0.020393 -2.106308  
 Li -0.517243 -1.342052 0.450516  
 O 0.611220 0.192058 1.075983  
 C -2.248112 -1.597704 -2.640997  
 C -1.665085 2.469440 -0.895475  
 C -4.063844 -1.809415 -0.105510  
 H -2.167657 3.434006 -0.714180  
 H -1.629540 2.303227 -1.985221  
 H -0.628422 2.545745 -0.513542  
 H -4.599028 -2.039661 0.828209  
 H -3.150574 -2.432660 -0.129566  
 H -4.714191 -2.077565 -0.961680  
 C 1.982564 0.510763 0.763046  
 C 0.320048 0.856597 2.325186  
 C 2.726668 0.529951 2.116369  
 H 2.019861 1.508292 0.273654  
 H 2.348831 -0.246448 0.049021  
 C 1.591614 0.680679 3.171480  
 H -0.579856 0.373703 2.742066  
 H 0.115719 1.930559 2.121663  
 H 1.510340 -0.229535 3.792919  
 H 1.752741 1.538725 3.848649  
 H 3.450162 1.364058 2.157473  
 H 3.291913 -0.406760 2.271298  
 O 0.783963 -2.742038 -0.136392  
 Cl -1.559082 -2.201469 2.333594  
 C 0.232858 -3.908649 -0.809370  
 C 1.704632 -3.164792 0.910186  
 C 1.070239 -5.100412 -0.337983  
 H 0.284314 -3.732609 -1.899796  
 H -0.830477 -4.013384 -0.510007  
 C 1.478493 -4.667654 1.082088  
 H 1.964046 -5.226388 -0.979858  
 H 0.497417 -6.044830 -0.356950  
 H 1.473194 -2.581019 1.819716  
 H 2.739199 -2.938948 0.577354  
 H 2.379614 -5.188061 1.453235  
 H 0.650064 -4.845172 1.794452  
 C -3.501488 2.948422 1.461249  
 C -5.357637 0.233794 1.690956  
 H -3.736587 3.810493 0.801853  
 H -2.552147 3.188330 1.982810  
 H -4.297748 2.894254 2.223458



H -6.249293 -0.079731 1.110096  
 H -5.633901 1.130443 2.271756  
 H -5.135028 -0.577154 2.415444  
 H 0.346525 -0.856616 -2.259947  
 H 0.099577 0.661411 -1.379804  
 H -0.417603 0.510243 -3.087383  
 H -1.583502 -2.482977 -2.731724  
 H -2.298413 -1.153880 -3.664688  
 H -3.260921 -1.967263 -2.417639

[LiCl(THF)2(NHO7)]:

58

Energy = 0.00 kcal/mol

C -3.454373 1.841799 0.556100  
 C -4.324616 0.724568 0.619659  
 N -2.424296 1.514869 -0.325356  
 N -3.794451 -0.265026 -0.202238  
 C -2.600965 0.195861 -0.805449  
 C -1.791157 -0.503018 -1.689303  
 C -0.406278 -0.046636 -2.112021  
 Li -0.468759 -1.350607 0.545319  
 O 0.609272 0.195533 1.120309  
 C -2.322723 -1.624542 -2.563668  
 C -1.585895 2.532876 -0.936613  
 C -4.213486 -1.653788 -0.107627  
 H -2.072141 3.515432 -0.805303  
 H -1.486853 2.342336 -2.018148  
 H -0.577119 2.581414 -0.483825  
 H -4.728013 -1.800210 0.856982  
 H -3.325269 -2.308137 -0.108706  
 H -4.900255 -1.946700 -0.925421  
 C 1.979679 0.519981 0.801201  
 C 0.320364 0.856968 2.374692  
 C 2.728589 0.551024 2.151409  
 H 2.008248 1.514197 0.305746  
 H 2.347242 -0.239973 0.090706  
 C 1.597048 0.684313 3.212543  
 H -0.576461 0.370936 2.795086  
 H 0.109719 1.929550 2.173686  
 H 1.526634 -0.230284 3.829008  
 H 1.754441 1.539060 3.894672  
 H 3.438195 1.396981 2.188428  
 H 3.310582 -0.375848 2.303805  
 O 0.790880 -2.745759 -0.102187  
 Cl -1.636230 -2.217976 2.291471  
 C 0.239274 -3.911738 -0.779716

C 1.738089 -3.173489 0.920253  
 C 1.083052 -5.104024 -0.321526  
 H 0.285748 -3.729671 -1.869380  
 H -0.821055 -4.021023 -0.472083  
 C 1.509355 -4.675407 1.094217  
 H 1.968647 -5.228109 -0.974805  
 H 0.509477 -6.047867 -0.336595  
 H 1.534821 -2.590166 1.836447  
 H 2.764385 -2.951639 0.561319  
 H 2.413700 -5.198191 1.453689  
 H 0.689226 -4.851607 1.816244  
 C -3.719015 3.010801 1.278407  
 C -5.480040 0.751343 1.409739  
 H 0.265734 -0.926918 -2.194876  
 H 0.071483 0.650104 -1.406178  
 H -0.399748 0.427854 -3.119359  
 H -1.779472 -2.582619 -2.424573  
 H -2.178945 -1.349081 -3.632530  
 H -3.397256 -1.826502 -2.437527  
 C -4.888188 3.040270 2.075438  
 C -5.747718 1.930545 2.143813  
 H -6.647187 1.976932 2.774019  
 H -6.164543 -0.106071 1.453949  
 H -3.044673 3.876328 1.239033  
 H -5.122383 3.946934 2.651074

[LiCl(THF)<sub>2</sub>(NHO<sub>8</sub>)]:

52

Energy = 0.00 kcal/mol

C -3.718749 1.829427 0.593082  
 C -4.431013 0.477774 0.716807  
 N -2.449794 1.440773 -0.021517  
 N -3.830759 -0.283844 -0.389168  
 C -2.568423 0.222443 -0.656048  
 C -1.561670 -0.446756 -1.350109  
 C -0.661589 -0.013235 -2.464009  
 Li -0.494203 -1.204845 0.549135  
 O 0.841268 0.183288 1.080813  
 C -1.611588 -1.198836 -2.640273  
 C -1.445932 2.434046 -0.332326  
 C -4.126357 -1.704624 -0.478294  
 H -1.292365 3.083337 0.549371  
 H -1.737335 3.079831 -1.190422  
 H -0.493533 1.933323 -0.567889  
 H -5.221613 -1.844074 -0.431809  
 H -3.648876 -2.262558 0.356854

H -3.762261 -2.107244 -1.437188  
 C 2.157157 0.374444 0.501847  
 C 0.783372 0.842582 2.368442  
 C 3.042790 0.983663 1.611941  
 H 2.075753 1.038752 -0.381037  
 H 2.513724 -0.617466 0.159609  
 C 2.214452 0.768902 2.896643  
 H 0.029015 0.302102 2.966980  
 H 0.458046 1.897258 2.230775  
 H 2.407315 -0.231204 3.330654  
 H 2.420818 1.528340 3.672427  
 H 3.196547 2.064796 1.432278  
 H 4.037534 0.506589 1.658590  
 O 0.667708 -2.789516 0.108740  
 Cl -1.745892 -1.793261 2.435130  
 H -4.280225 2.532109 -0.065115  
 H -3.555673 2.324635 1.568684  
 H -4.194744 -0.012385 1.687193  
 H -5.527805 0.547803 0.602313  
 C 0.054355 -3.897699 -0.615606  
 C 1.424763 -3.307450 1.241960  
 C 0.560759 -5.182964 0.050921  
 H 0.345739 -3.815187 -1.678639  
 H -1.044237 -3.791123 -0.535156  
 C 0.882563 -4.715204 1.482312  
 H 1.476338 -5.548901 -0.452056  
 H -0.193579 -5.989479 0.017016  
 H 1.263998 -2.620308 2.090672  
 H 2.501038 -3.321093 0.972873  
 H 1.613099 -5.365689 1.997159  
 H -0.038481 -4.661124 2.093481  
 H -2.464399 -1.047127 -3.323270  
 H -1.174938 -2.208901 -2.705006  
 H 0.418557 -0.228273 -2.394772  
 H -0.888118 0.901075 -3.037166

## Lactones

BBL:

12

Energy = 0.00 kcal/mol

C -0.856187 0.032478 0.578922  
C -1.929894 -0.823502 -0.097910  
C -0.761596 -1.793722 -0.377481  
H -2.402673 -0.344989 -0.974352  
H -2.710941 -1.194014 0.591547  
O 0.168774 -0.857201 0.319346  
O -0.783735 1.089068 1.146862  
C -0.775238 -3.160162 0.271270  
H -0.462892 -1.843408 -1.442117  
H 0.225672 -3.627715 0.216957  
H -1.492960 -3.818568 -0.256207  
H -1.075384 -3.090579 1.334044

GBL:

12

Energy = 0.00 kcal/mol

C -2.142963 0.566821 -0.115613  
C -3.233595 -0.472834 0.149713  
C -2.541270 -1.814874 -0.123963  
H -4.117028 -0.263367 -0.477969  
H -3.548943 -0.365816 1.208303  
C -1.061655 -1.477116 0.142830  
H -2.682089 -2.113217 -1.180420  
H -2.898940 -2.643443 0.513485  
O -0.922962 -0.063773 -0.139764  
H -0.350986 -2.016756 -0.507461  
H -0.776962 -1.646571 1.201802  
O -2.256022 1.759671 -0.278220

VL:

15

Energy = 0.00 kcal/mol

C -3.298980 0.301462 -1.551945  
C -1.787729 0.091175 -1.381939  
C -1.508237 -1.401547 -1.189208  
H -1.411725 0.689041 -0.529518  
H -1.249847 0.452133 -2.283405  
C -2.023847 -2.167794 -2.399711  
H -2.004321 -1.772209 -0.268190  
H -0.424590 -1.603917 -1.079155

O -3.416101 -1.900206 -2.711078  
H -1.971132 -3.262442 -2.256174  
H -1.431220 -1.912994 -3.304078  
C -4.021455 -0.706839 -2.442456  
H -3.549576 1.305123 -1.942222  
H -3.807434 0.226112 -0.566796  
O -5.141367 -0.511696 -2.872420

CL:

18

Energy = 0.00 kcal/mol

C -2.956529 1.248218 -0.230801  
C -3.055764 -0.194675 0.317384  
C -1.887097 -1.105253 -0.086376  
H -3.999335 -0.639373 -0.054811  
H -3.148446 -0.157977 1.422549  
C -0.503808 -0.607011 0.355389  
H -1.888537 -1.218403 -1.192155  
H -2.057413 -2.120202 0.324980  
C -0.123361 0.778096 -0.172107  
H 0.268072 -1.321864 0.002808  
H -0.426361 -0.588256 1.462565  
O -0.693758 1.871883 0.581712  
H -0.380861 0.886666 -1.247060  
H 0.964089 0.942600 -0.073482  
C -2.030040 2.154290 0.570124  
H -3.942894 1.741202 -0.195840  
H -2.637945 1.224451 -1.294956  
O -2.424914 3.105865 1.216078

## Tetrahedral [MgCl<sub>2</sub>(THF)(Lac)] complexes

[MgCl<sub>2</sub>(THF)(BBL)] bidentate:

28

Energy = 0.00 kcal/mol

Mg -0.251350 2.440743 -0.561283  
O -1.887526 1.771921 0.525715  
C -2.957613 2.665611 0.941055  
C -4.161423 2.181131 0.136596  
H -2.621817 3.692171 0.710393  
H -3.110489 2.548417 2.035395  
C -3.969516 0.643840 0.109747  
H -4.117362 2.604493 -0.884549  
H -5.121175 2.483935 0.592926  
C -2.455523 0.434856 0.351345  
H -4.291770 0.206816 -0.852110  
H -4.559582 0.160283 0.910566  
H -1.911319 -0.023929 -0.493502  
H -2.255884 -0.144983 1.274148  
Cl -0.652143 4.699916 -0.800039  
Cl 0.227651 0.689442 -1.980302  
C 2.430162 2.638762 0.860018  
O 3.114168 3.110177 -0.198198  
C 4.390515 3.157792 0.603455  
C 3.600393 2.618896 1.821889  
H 3.494849 3.311304 2.677125  
H 3.870367 1.610990 2.184376  
C 4.964032 4.552312 0.651921  
H 5.083954 2.423376 0.155145  
H 5.868089 4.555407 1.291882  
H 4.233629 5.271916 1.066213  
H 5.257105 4.887394 -0.359867  
O 1.245397 2.348776 0.902479

[MgCl<sub>2</sub>(THF)(BBL)] carbonyl:

28

Energy = 0.00 kcal/mol

Mg -0.264420 2.451919 -0.836846  
O -1.832450 1.839537 0.348645  
C -2.903449 2.732175 0.765042  
C -4.140947 2.145783 0.090534  
H -2.621559 3.746477 0.431209

H -2.976495 2.703240 1.873125  
 C -3.896796 0.618725 0.179645  
 H -4.182380 2.479816 -0.963360  
 H -5.077449 2.457940 0.586883  
 C -2.361810 0.474535 0.301078  
 H -4.286065 0.087967 -0.707185  
 H -4.396762 0.192728 1.069335  
 H -1.875926 -0.015810 -0.561670  
 H -2.059650 -0.041258 1.233301  
 Cl -0.646525 4.707519 -1.237985  
 Cl 0.170370 0.705831 -2.264664  
 C 2.313373 3.297787 0.367215  
 O 3.304297 3.438440 1.268884  
 C 3.993838 4.456774 0.386930  
 C 2.856378 4.279063 -0.645198  
 H 3.138956 3.819370 -1.610376  
 H 2.175370 5.130934 -0.828982  
 C 5.393673 4.025079 0.026131  
 H 3.966615 5.421234 0.925942  
 H 5.836517 4.767586 -0.665989  
 H 5.391151 3.038343 -0.473563  
 H 6.033712 3.969327 0.925883  
 O 1.335632 2.572960 0.491040

[MgCl<sub>2</sub>(THF)(BBL)] endocyclic:

28

Energy = 0.00 kcal/mol

Mg -0.318716 2.768252 -0.584595  
 O -2.058811 1.932375 0.066445  
 C -3.135471 2.669132 0.725895  
 C -4.395247 1.884845 0.372631  
 H -3.098010 3.707005 0.351213  
 H -2.939976 2.670741 1.817772  
 C -3.885422 0.429990 0.373810  
 H -4.760900 2.174831 -0.631576  
 H -5.209725 2.055582 1.099213  
 C -2.471442 0.548361 -0.207190  
 H -4.518743 -0.248303 -0.225388  
 H -3.848720 0.035775 1.407614  
 H -2.436819 0.406969 -1.303351  
 H -1.735462 -0.124180 0.267796  
 Cl -0.485911 5.031964 -0.287055  
 Cl 0.566309 1.410087 -2.220218  
 C 1.359917 0.868123 1.388966  
 O 1.096208 2.169422 0.927938  
 C 2.576510 2.413649 0.683106  
 C 2.863426 0.991836 1.210171

H 3.437496 0.923917 2.152166  
H 3.262762 0.275298 0.470216  
C 3.066795 3.614785 1.450988  
H 2.705791 2.507447 -0.410843  
H 2.903773 3.493449 2.538323  
H 2.546338 4.528193 1.108850  
H 4.151337 3.742730 1.268252  
O 0.547444 0.066520 1.749754

[MgCl<sub>2</sub>(THF)(GBL)] bidentate:

28

Energy = 0.00 kcal/mol

Mg -0.842021 2.553824 -0.883949  
O -2.459159 1.905395 0.247632  
C -3.399727 2.820927 0.872954  
C -4.692948 2.648628 0.064718  
H -2.949380 3.827528 0.821450  
H -3.527048 2.512075 1.932206  
C -4.611788 1.192155 -0.482849  
H -4.718949 3.377591 -0.765635  
H -5.587578 2.819124 0.690665  
C -3.209355 0.699723 -0.072701  
H -4.723542 1.177257 -1.581671  
H -5.397918 0.542059 -0.057485  
H -2.651754 0.182460 -0.872765  
H -3.242830 0.068227 0.839375  
Cl -0.947153 4.853538 -0.696632  
Cl -0.782213 1.049554 -2.632931  
C 1.931133 2.229338 0.173773  
O 2.364977 2.778428 -0.963278  
C 3.810111 2.981746 -0.932876  
C 4.321695 2.079685 0.206706  
H 3.981743 4.059325 -0.747428  
H 4.190177 2.718369 -1.933890  
C 3.085336 1.948313 1.113607  
H 5.196648 2.517353 0.718274  
H 4.617523 1.090373 -0.189576  
H 3.053943 2.715271 1.915286  
H 2.957406 0.964837 1.598188  
O 0.735979 2.019143 0.374384

[MgCl<sub>2</sub>(THF)(GBL)] carbonyl:

28

Energy = 0.00 kcal/mol

Mg -0.529586 2.014013 -0.848950



O -2.274240 1.793266 0.218657  
 C -3.153325 2.912442 0.526362  
 C -4.451746 2.556135 -0.191224  
 H -2.646952 3.824451 0.162974  
 H -3.285066 2.966377 1.627926  
 C -4.542773 1.024796 0.008509  
 H -4.367102 2.812583 -1.264394  
 H -5.323603 3.093097 0.223945  
 C -3.074467 0.566169 0.153036  
 H -5.044413 0.524262 -0.838561  
 H -5.115185 0.785833 0.924371  
 H -2.688917 -0.009843 -0.707803  
 H -2.898064 -0.007809 1.083107  
 Cl -0.347974 4.281110 -1.308332  
 Cl -0.400482 0.204368 -2.269606  
 C 2.176064 1.948664 0.352749  
 O 3.066648 1.693247 1.318819  
 C 4.422375 1.993286 0.859479  
 C 4.248888 2.901791 -0.371405  
 H 4.904288 1.025668 0.619174  
 H 4.949351 2.461390 1.707846  
 C 2.845286 2.524559 -0.873688  
 H 5.041587 2.734247 -1.121231  
 H 4.278813 3.966839 -0.075210  
 H 2.850477 1.733769 -1.653634  
 H 2.232688 3.361162 -1.264824  
 O 0.980573 1.709971 0.529012

[MgCl<sub>2</sub>(THF)(GBL)] endocyclic:

28

Energy = 0.00 kcal/mol

Mg -1.424992 2.886904 -1.863616  
 O -2.692010 1.894400 -0.613854  
 C -3.100589 2.418331 0.694140  
 C -4.434059 1.732125 0.979081  
 H -3.146924 3.518052 0.602298  
 H -2.315384 2.144725 1.425102  
 C -4.247611 0.355779 0.311309  
 H -5.266477 2.287602 0.505101  
 H -4.639875 1.661156 2.062083  
 C -3.460099 0.694951 -0.956290  
 H -5.204143 -0.145499 0.078372  
 H -3.660044 -0.316018 0.966717  
 H -4.116793 0.945830 -1.811338  
 H -2.748950 -0.086497 -1.276652  
 Cl -1.562291 5.120294 -1.356104

Cl -1.342361 1.642292 -3.794974  
 C 1.089305 2.348799 0.061757  
 O 0.615505 2.510154 -1.236236  
 C 1.703352 2.832469 -2.170681  
 C 2.973048 2.361974 -1.447585  
 H 1.675236 3.927026 -2.332575  
 H 1.469233 2.307551 -3.112025  
 C 2.598274 2.512118 0.035608  
 H 3.853646 2.959020 -1.741709  
 H 3.181192 1.302564 -1.689150  
 H 2.822027 3.526494 0.426901  
 H 3.068885 1.784632 0.718743  
 O 0.335033 2.121457 0.974390

[MgCl<sub>2</sub>(THF)(VL)] bidentate:

31

Energy = 0.00 kcal/mol

O -2.637330 1.732122 0.497607  
 C -4.006835 2.144028 0.759553  
 C -4.852342 1.355957 -0.254495  
 H -4.040299 3.240457 0.636327  
 H -4.252518 1.868397 1.806865  
 C -3.978288 0.114229 -0.606788  
 H -5.040514 1.970363 -1.153288  
 H -5.832390 1.076245 0.172807  
 C -2.687529 0.307651 0.209192  
 H -3.749615 0.089072 -1.687378  
 H -4.475033 -0.838138 -0.346527  
 H -1.757917 0.058343 -0.331250  
 H -2.724651 -0.235083 1.177161  
 Cl -2.401403 4.963213 -0.656523  
 Cl 0.005487 1.596696 -1.701271  
 Mg -1.211664 3.005729 -0.326295  
 C 1.917016 4.306419 2.421630  
 C 2.897273 5.474648 2.243862  
 C 3.466378 5.444983 0.821109  
 H 3.701097 5.409224 3.000244  
 H 2.373708 6.437040 2.417238  
 C 2.334767 5.560550 -0.188198  
 H 4.032388 4.506358 0.650497  
 H 4.168675 6.283178 0.647767  
 O 1.246789 4.616992 0.062598  
 H 2.653077 5.338378 -1.221110  
 H 1.870780 6.566122 -0.171527  
 C 0.992773 4.075334 1.248151  
 H 1.280625 4.405070 3.320373

H 2.467147 3.349157 2.547424  
O -0.004409 3.346731 1.341853

[MgCl<sub>2</sub>(THF)(VL)] carbonyl:

31

Energy = 0.00 kcal/mol

O -2.310602 1.573386 0.389196  
C -3.337561 2.508798 -0.046832  
C -4.249796 1.655677 -0.923568  
H -2.817719 3.331510 -0.569526  
H -3.863279 2.899654 0.850129  
C -4.264094 0.294893 -0.186056  
H -3.807529 1.555895 -1.932863  
H -5.258741 2.092952 -1.031404  
C -2.928727 0.260813 0.592229  
H -4.348739 -0.554486 -0.886919  
H -5.120177 0.238411 0.511997  
H -2.202367 -0.485260 0.222016  
H -3.077151 0.116971 1.680078  
Cl -0.235298 3.683293 -1.473859  
Cl 0.452610 -0.344306 -0.594603  
Mg -0.334525 1.788208 -0.147721  
C 2.809472 2.382770 0.461401  
C 4.309404 2.516262 0.758129  
C 4.527917 3.608142 1.809504  
H 4.856466 2.740211 -0.175956  
H 4.708299 1.552750 1.135537  
C 3.749006 3.260528 3.067837  
H 4.200213 4.594571 1.421968  
H 5.597262 3.704051 2.081317  
O 2.332083 3.001813 2.816353  
H 3.746508 4.077060 3.810859  
H 4.151252 2.347651 3.551411  
C 1.885515 2.562673 1.641182  
H 2.545623 1.403784 0.006755  
H 2.466725 3.143237 -0.276246  
O 0.668100 2.342610 1.556490

[MgCl<sub>2</sub>(THF)(CL)] bidentate:

34

Energy = 0.00 kcal/mol

Mg -0.905762 1.700609 -0.396762  
O 1.835063 2.181822 -0.265044  
O -2.735187 1.410906 0.557812  
C -3.684000 2.483964 0.806318  
C -4.886653 2.167397 -0.100976

H -3.165540 3.429913 0.572694  
 H -3.958688 2.454665 1.881783  
 C -4.764169 0.640946 -0.391990  
 H -4.826757 2.751339 -1.036894  
 H -5.839310 2.426473 0.395811  
 C -3.522530 0.198757 0.399552  
 H -4.612219 0.458748 -1.471079  
 H -5.661274 0.076909 -0.078393  
 H -2.881349 -0.533886 -0.120486  
 H -3.786410 -0.172429 1.412337  
 C 2.945832 2.922526 -0.864444  
 C 3.457359 4.082238 -0.021267  
 H 2.502574 3.281285 -1.808708  
 H 3.734150 2.183209 -1.104917  
 C 4.419402 3.665074 1.107324  
 H 2.576801 4.629890 0.371849  
 H 3.960461 4.793910 -0.704666  
 C 1.524446 2.049888 1.020166  
 Cl -0.960473 3.973530 -0.912616  
 Cl -0.695747 -0.210560 -1.675535  
 O 0.376294 1.642494 1.261138  
 C 2.487141 2.333419 2.154021  
 C 3.983376 2.371863 1.816498  
 H 2.261128 1.556755 2.908785  
 H 2.153188 3.287963 2.614852  
 H 4.236319 1.488822 1.195454  
 H 4.559305 2.248137 2.753321  
 H 4.493527 4.490895 1.843062  
 H 5.439853 3.524291 0.698551

[MgCl<sub>2</sub>(THF)(CL)] carbonyl:

34

Energy = 0.00 kcal/mol

Mg -0.597582 2.286334 -0.498812  
 O 2.838768 1.279019 1.665116  
 O -2.330015 1.537214 0.336032  
 C -3.330288 2.395914 0.956545  
 C -4.590811 2.132739 0.139216  
 H -2.938746 3.427670 0.906172  
 H -3.451204 2.090089 2.017502  
 C -4.498311 0.615235 -0.134499  
 H -4.553701 2.710420 -0.804208  
 H -5.511216 2.414272 0.681961  
 C -2.982851 0.331253 -0.187479  
 H -5.001445 0.324438 -1.073802  
 H -4.971118 0.047007 0.689023

H -2.584002 0.178844 -1.207196  
 H -2.685563 -0.523856 0.449242  
 C 4.289013 1.339193 1.824922  
 C 5.070146 1.496486 0.523618  
 H 4.510809 0.372404 2.308673  
 H 4.514850 2.142303 2.553884  
 C 5.210153 2.957933 0.054132  
 H 4.576268 0.873192 -0.249356  
 H 6.070601 1.044115 0.670361  
 C 2.104715 1.966256 0.790912  
 Cl -0.695690 4.579574 -0.139540  
 Cl -0.293145 1.113497 -2.463197  
 O 0.906819 1.647121 0.736456  
 C 2.641385 3.078682 -0.087270  
 C 3.941839 3.783731 0.317406  
 H 1.803789 3.807925 -0.139502  
 H 2.712841 2.652153 -1.112143  
 H 3.880750 4.071373 1.386358  
 H 3.997119 4.740148 -0.236103  
 H 5.450738 2.970630 -1.027728  
 H 6.068207 3.437514 0.566110

### Trigonal-bipyramidal $[\text{MgCl}_2(\text{THF})_2(\text{Lac})]$ complexes

$[\text{MgCl}_2(\text{THF})_2(\text{BBL})]$  bidentate:

41

Energy = 0.00 kcal/mol

Mg 0.341164 1.781919 0.581905  
 Cl 1.491166 3.716325 1.290463  
 O 2.134440 0.953885 -0.361121  
 O -2.110351 4.233514 0.380164  
 Cl -1.122284 0.872015 -1.025061  
 C 3.257157 1.736728 -0.842961  
 C 3.155516 1.661727 -2.375303  
 H 4.192156 1.260043 -0.475601  
 H 3.158117 2.743068 -0.403286  
 C 2.390897 0.330290 -2.638651  
 H 4.155298 1.678902 -2.846621  
 H 2.585305 2.524260 -2.765747  
 C 2.072116 -0.204892 -1.230144  
 H 2.991993 -0.395220 -3.216991  
 H 1.453122 0.516631 -3.191558  
 H 2.836652 -0.935507 -0.886856

H 1.059897 -0.631262 -1.134727  
 C -3.357715 4.921377 0.790218  
 C -2.184859 3.392556 1.440816  
 O 0.575428 0.357554 2.095366  
 C 1.713782 0.417196 3.006751  
 C 1.200159 -0.177882 4.318705  
 H 2.034025 1.473496 3.068872  
 H 2.534185 -0.185637 2.567423  
 C 0.150662 -1.196117 3.832418  
 H 0.723389 0.607359 4.937029  
 H 2.009674 -0.638294 4.913140  
 C -0.489335 -0.467837 2.648353  
 H -0.590532 -1.461022 4.607859  
 H 0.642186 -2.129935 3.495930  
 H -1.314385 0.200331 2.964003  
 H -0.855054 -1.129658 1.843179  
 O -1.435201 2.476815 1.713212  
 C -3.453126 4.003696 2.033794  
 H -4.133939 4.773688 0.018635  
 H -3.157930 5.992579 0.964925  
 C -4.660862 3.084292 2.198756  
 H -3.221518 4.539113 2.975722  
 H -4.874367 2.531878 1.264803  
 H -5.558377 3.669042 2.474854  
 H -4.474852 2.345123 2.999732

[MgCl<sub>2</sub>(THF)<sub>2</sub>(BBL)] carbonyl:  
 41

Energy = 0.00 kcal/mol

Mg 0.340304 1.460711 1.051466  
 Cl 1.845853 3.215074 1.530918  
 O 4.207733 -0.556982 0.260502  
 O -1.428497 2.624383 1.558427  
 Cl -0.585303 0.566864 -0.917049  
 C 3.104625 0.240964 0.212119  
 C 4.905355 0.301219 -0.734719  
 C -1.406564 3.874722 2.290722  
 C -1.969181 4.915805 1.307436  
 H -0.362637 4.054133 2.596988  
 H -2.058337 3.765035 3.184873  
 C -2.835023 4.076070 0.321366  
 H -1.142897 5.420230 0.774762  
 H -2.555877 5.691084 1.833292  
 C -2.677199 2.628770 0.821134  
 H -2.456325 4.169036 -0.712579  
 H -3.895839 4.386750 0.320268  
 H -2.584261 1.868973 0.027354

H -3.493706 2.350608 1.522713  
 O -0.061797 0.229420 2.702169  
 C 0.844832 0.164330 3.846034  
 C 0.689066 -1.251694 4.414103  
 H 0.558293 0.962699 4.555105  
 H 1.869610 0.361440 3.478197  
 C 0.238337 -2.067583 3.187028  
 H -0.089269 -1.273828 5.201697  
 H 1.630468 -1.622654 4.856951  
 C -0.665663 -1.077180 2.457496  
 H -0.293040 -2.997523 3.458114  
 H 1.105456 -2.330568 2.552266  
 H -1.693173 -1.066714 2.877019  
 H -0.722954 -1.216211 1.362359  
 O 2.087695 0.079756 0.858574  
 C 2.931968 1.401931 -2.124581  
 C 3.670418 1.230318 -0.798833  
 H 5.123709 -0.285686 -1.644386  
 H 5.826325 0.714595 -0.288320  
 H 3.518601 2.050355 -2.802092  
 H 1.945200 1.869076 -1.956342  
 H 2.760656 0.429427 -2.622372  
 H 3.820115 2.207331 -0.297111

[MgCl<sub>2</sub>(THF)<sub>2</sub>(BBL)] endocyclic:

41

Energy = 0.00 kcal/mol

Mg -0.088239 1.437254 0.717584  
 Cl 1.510619 3.148169 0.568703  
 O 1.652883 0.041349 -0.141289  
 O -1.602284 2.624415 1.675416  
 Cl -1.446972 0.403582 -0.876615  
 C 2.995519 -0.043605 0.225593  
 C 2.023710 0.289044 -1.564237  
 C -1.517321 4.058155 1.891400  
 C -2.513172 4.658715 0.888337  
 H -0.464540 4.346279 1.734021  
 H -1.818608 4.265583 2.940966  
 C -3.561515 3.526686 0.673002  
 H -1.997520 4.900707 -0.058525  
 H -2.964997 5.590417 1.274593  
 C -3.016015 2.342080 1.493694  
 H -3.633451 3.252864 -0.394590  
 H -4.571053 3.817347 1.016642  
 H -3.090333 1.368436 0.981199  
 H -3.486584 2.286933 2.498465  
 O 0.100041 0.238594 2.397462

C 0.904255 0.619669 3.560060  
 C 1.009339 -0.650677 4.408393  
 H 0.387688 1.456036 4.064830  
 H 1.890028 0.961229 3.192479  
 C 0.901919 -1.772682 3.357666  
 H 0.171609 -0.710549 5.130628  
 H 1.955564 -0.685568 4.976667  
 C -0.119693 -1.204521 2.374465  
 H 0.572203 -2.735610 3.787594  
 H 1.875538 -1.920954 2.854796  
 H -1.163493 -1.398586 2.694310  
 H 0.003398 -1.544830 1.331711  
 O 3.426013 -0.242231 1.329753  
 C 4.428188 1.380745 -1.411797  
 C 3.519743 0.170426 -1.195605  
 H 1.683412 1.294877 -1.861288  
 H 1.582696 -0.495745 -2.199539  
 H 4.614397 1.530917 -2.491829  
 H 5.402481 1.224031 -0.913609  
 H 3.962559 2.294497 -0.999136  
 H 3.986560 -0.758616 -1.579497

[MgCl<sub>2</sub>(THF)<sub>2</sub>(GBL)] bidentate:

41

Energy = 0.00 kcal/mol

Mg 0.272867 1.095595 0.957020  
 Cl 0.394202 3.072431 2.255714  
 O 2.330669 1.368574 0.260887  
 O -2.827113 2.234746 0.893591  
 Cl -0.460679 0.213904 -1.099393  
 C 2.871861 2.665695 -0.093697  
 C 2.836366 2.673951 -1.624767  
 H 3.912701 2.731141 0.293651  
 H 2.247669 3.422261 0.410688  
 C 3.106634 1.190739 -1.999759  
 H 3.580038 3.368735 -2.056163  
 H 1.833259 2.981797 -1.972739  
 C 2.907918 0.420284 -0.673516  
 H 4.132213 1.047203 -2.387970  
 H 2.395192 0.837434 -2.766031  
 H 3.872917 0.065916 -0.253432  
 H 2.200134 -0.420739 -0.760064  
 C -4.128826 2.873111 1.012499  
 C -4.997810 1.882377 1.809979  
 H -4.484782 3.072999 -0.012047  
 H -3.976434 3.833928 1.541462



C -3.948655 1.110576 2.626330  
 H -5.532008 1.200016 1.122457  
 H -5.749774 2.398422 2.432359  
 C -2.680312 1.263274 1.804712  
 H -4.175175 0.044066 2.796589  
 H -3.754759 1.571260 3.617111  
 O -1.636200 0.634175 1.924962  
 O 1.041822 -0.493229 2.090550  
 C 1.850071 -0.212744 3.271831  
 C 1.404102 -1.248352 4.303252  
 H 1.664920 0.839857 3.555303  
 H 2.917942 -0.333119 2.996746  
 C 1.061193 -2.463071 3.418836  
 H 0.505305 -0.889977 4.841565  
 H 2.190157 -1.462075 5.049588  
 C 0.427517 -1.811838 2.184760  
 H 0.375226 -3.178164 3.907675  
 H 1.982735 -3.010978 3.140626  
 H -0.664768 -1.670912 2.295832  
 H 0.622663 -2.346875 1.237887

[MgCl<sub>2</sub>(THF)<sub>2</sub>(GBL)] carbonyl:

41

Energy = 0.00 kcal/mol

Mg 0.160897 1.427227 0.934776  
 Cl 0.661216 3.430175 2.090165  
 O 2.161693 1.246970 0.103665  
 O -3.877129 1.673765 2.419084  
 Cl -0.889192 1.081704 -1.151976  
 C 2.904795 2.419071 -0.337792  
 C 3.126517 2.189954 -1.829592  
 H 3.864516 2.460472 0.220493  
 H 2.303246 3.304770 -0.071221  
 C 3.373458 0.669847 -1.885303  
 H 3.973036 2.779086 -2.226954  
 H 2.212376 2.457138 -2.393296  
 C 2.443620 0.123903 -0.788433  
 H 4.432187 0.441948 -1.652884  
 H 3.141170 0.232140 -2.872850  
 H 2.904785 -0.686814 -0.191729  
 H 1.471858 -0.216847 -1.194297  
 C -4.887772 2.664721 2.064813  
 C -4.106168 3.890280 1.558135  
 H -5.491912 2.845492 2.970402  
 H -5.529715 2.213347 1.282769  
 C -2.790955 3.267379 1.064169

H -3.912581 4.596720 2.387132  
 H -4.658026 4.432408 0.770481  
 C -2.701609 1.969277 1.828428  
 H -1.874976 3.858824 1.256685  
 H -2.784949 3.005270 -0.015499  
 O -1.740367 1.217021 1.950267  
 O 0.714566 -0.263972 2.053888  
 C 1.665628 -0.068429 3.145695  
 C 1.166623 -0.976070 4.269406  
 H 1.673949 1.009451 3.392572  
 H 2.671029 -0.365223 2.783790  
 C 0.533615 -2.146157 3.492276  
 H 0.403373 -0.452025 4.876186  
 H 1.983122 -1.293599 4.942422  
 C -0.115783 -1.439118 2.299598  
 H -0.204214 -2.713719 4.087240  
 H 1.315352 -2.853236 3.152168  
 H -1.141348 -1.090136 2.523161  
 H -0.133395 -2.040139 1.372203

[MgCl<sub>2</sub>(THF)<sub>2</sub>(VL)] bidentate:

44

Energy = 0.00 kcal/mol

Mg 0.098675 1.594081 0.774999  
 Cl 1.023241 3.564009 1.717575  
 O 2.046259 1.066605 -0.116106  
 O -2.274823 3.572463 0.528130  
 Cl -1.103761 0.684674 -1.051219  
 C 3.049756 2.023248 -0.538643  
 C 2.991100 1.991898 -2.073814  
 H 4.038192 1.677005 -0.164075  
 H 2.794843 2.985642 -0.064735  
 C 2.477786 0.558261 -2.400085  
 H 3.979024 2.204501 -2.522144  
 H 2.281327 2.753568 -2.445069  
 C 2.180972 -0.058513 -1.018670  
 H 3.224570 -0.040494 -2.953508  
 H 1.552959 0.597403 -3.002200  
 H 3.024566 -0.688822 -0.661815  
 H 1.235419 -0.623944 -0.981098  
 C -3.196544 4.552222 -0.028421  
 C -3.841817 2.993056 2.349915  
 C -2.568203 2.779316 1.556047  
 O 0.480860 0.037753 2.131868  
 C 1.570891 0.153784 3.094647  
 C 1.074554 -0.578988 4.341681  
 H 1.773417 1.231181 3.237923

H 2.467775 -0.329214 2.656254  
 C 0.168716 -1.672661 3.743406  
 H 0.486056 0.106707 4.981747  
 H 1.905722 -0.984897 4.945968  
 C -0.500017 -0.942871 2.575623  
 H -0.569907 -2.068324 4.463664  
 H 0.777154 -2.522267 3.376111  
 H -1.412214 -0.398433 2.888182  
 H -0.747192 -1.587101 1.712830  
 C -4.232238 5.042087 0.972720  
 H -3.674078 4.061953 -0.900068  
 H -2.544414 5.362709 -0.397748  
 C -4.908082 3.841352 1.642846  
 H -4.965585 5.671802 0.432391  
 H -3.747235 5.686677 1.734252  
 H -3.515304 3.486356 3.290391  
 H -4.211658 1.993825 2.643866  
 H -5.428555 3.231054 0.876427  
 H -5.677257 4.164667 2.369086  
 O -1.755235 1.905891 1.866870

[MgCl<sub>2</sub>(THF)<sub>2</sub>(VL)] carbonyl:

44

Energy = 0.00 kcal/mol

Mg 0.760590 1.567904 0.961966  
 Cl 1.926917 3.426477 1.855753  
 O 2.448533 0.983161 -0.286018  
 O -2.590360 2.553361 3.465157  
 Cl -0.819539 1.337083 -0.782160  
 C 3.385213 1.925963 -0.865751  
 C 2.961275 2.019058 -2.334555  
 H 4.410907 1.508643 -0.760220  
 H 3.304527 2.857693 -0.281406  
 C 2.428683 0.593776 -2.650212  
 H 3.800179 2.319043 -2.988792  
 H 2.153788 2.765675 -2.445410  
 C 2.285144 -0.076087 -1.263733  
 H 3.129235 0.025781 -3.289995  
 H 1.453278 0.638964 -3.165274  
 H 3.077024 -0.834119 -1.087469  
 H 1.291904 -0.525599 -1.097371  
 C -3.603626 3.568297 3.729049  
 C -1.650675 3.913499 1.610892  
 C -1.648118 2.714748 2.522849  
 O 1.109968 -0.237004 1.983153  
 C 2.031634 -0.186032 3.113374

C 1.248310 -0.783428 4.280016  
 H 2.331828 0.869587 3.250498  
 H 2.927640 -0.790321 2.860731  
 C 0.394583 -1.859541 3.580992  
 H 0.603186 -0.010908 4.739871  
 H 1.911452 -1.197256 5.060688  
 C 0.042511 -1.202299 2.240169  
 H -0.510097 -2.130907 4.153776  
 H 0.987236 -2.781949 3.423621  
 H -0.910367 -0.643033 2.281856  
 H 0.011282 -1.910295 1.391708  
 C -3.937559 4.413110 2.509515  
 H -3.216828 4.198390 4.555946  
 H -4.471351 2.997476 4.104548  
 C -2.649523 5.026960 1.953250  
 H -4.662986 5.192411 2.815174  
 H -4.434031 3.786003 1.740670  
 H -1.834456 3.476906 0.602988  
 H -0.597942 4.265852 1.578668  
 H -2.211742 5.711788 2.708103  
 H -2.852149 5.637726 1.053999  
 O -0.810950 1.813978 2.420426

[MgCl<sub>2</sub>(THF)<sub>2</sub>(CL)] bidentate:

47

Energy = 0.00 kcal/mol

Mg 0.274627 1.621109 1.047393  
 Cl 1.449036 3.646203 1.490841  
 O 1.880225 0.928190 -0.271635  
 O -1.981463 3.740052 1.213027  
 Cl -1.392976 0.555393 -0.242862  
 C 2.766953 1.775290 -1.042583  
 C 2.328468 1.568455 -2.501380  
 H 3.809690 1.424421 -0.879777  
 H 2.660433 2.798592 -0.646630  
 C 1.712478 0.138056 -2.508295  
 H 3.179880 1.670014 -3.199214  
 H 1.569697 2.320948 -2.784109  
 C 1.761770 -0.299761 -1.031147  
 H 2.277796 -0.560955 -3.151888  
 H 0.666292 0.160246 -2.861392  
 H 2.655740 -0.925079 -0.818082  
 H 0.844982 -0.808347 -0.690547  
 C -1.954269 3.154024 2.409719  
 C -2.783503 4.913428 0.919836  
 O 0.922585 0.202711 2.462582

C 1.915151 0.589623 3.455661  
 C 1.272268 0.241110 4.795888  
 H 2.127753 1.663615 3.301567  
 H 2.840616 0.002451 3.276929  
 C 0.491812 -1.043766 4.454787  
 H 0.582984 1.049244 5.107242  
 H 2.020350 0.092614 5.595440  
 C 0.007544 -0.790497 3.018650  
 H -0.349597 -1.234746 5.144839  
 H 1.164356 -1.922818 4.491628  
 H -1.011933 -0.364721 2.977235  
 H 0.041082 -1.688780 2.375033  
 C -2.818309 3.679729 3.534358  
 C -2.378442 5.079095 4.031525  
 H -2.741601 2.938559 4.347663  
 H -3.878877 3.709095 3.206937  
 C -2.834606 6.237412 3.132467  
 H -1.275125 5.092880 4.142023  
 H -2.797049 5.224345 5.046250  
 C -2.333532 6.158156 1.682400  
 H -2.500332 7.194160 3.580131  
 H -3.945944 6.271572 3.127261  
 H -1.226234 6.202501 1.640703  
 H -2.706071 7.039001 1.121280  
 H -3.852267 4.674932 1.099008  
 H -2.641421 5.041917 -0.166028  
 O -1.187199 2.200421 2.565991

[MgCl<sub>2</sub>(THF)<sub>2</sub>(CL)] carbonyl:

47

Energy = 0.00 kcal/mol

Mg 0.256366 2.012271 1.056024  
 Cl 1.446157 4.033695 1.343915  
 O 1.866322 1.134475 -0.153101  
 O -3.120776 3.211773 3.409126  
 Cl -1.431013 1.316338 -0.443221  
 C 2.718411 1.913234 -1.031241  
 C 2.148196 1.660400 -2.431100  
 H 3.758565 1.530299 -0.937530  
 H 2.675075 2.956380 -0.676106  
 C 1.589456 0.212046 -2.344319  
 H 2.916917 1.777894 -3.216676  
 H 1.332116 2.376191 -2.638714  
 C 1.635021 -0.123851 -0.836642  
 H 2.200435 -0.503034 -2.925841  
 H 0.552294 0.165274 -2.718894

H 2.474932 -0.808783 -0.592803  
 H 0.688014 -0.537436 -0.451880  
 C -2.129181 3.396932 2.520629  
 C -4.271460 4.097136 3.468787  
 O 0.823045 0.557276 2.458452  
 C 2.116082 0.682995 3.122317  
 C 1.869536 0.206915 4.553508  
 H 2.435119 1.737876 3.034991  
 H 2.843693 0.039234 2.587446  
 C 0.783365 -0.868502 4.358590  
 H 1.486762 1.039752 5.174565  
 H 2.787808 -0.183504 5.027668  
 C -0.085274 -0.267410 3.249799  
 H 0.201580 -1.069038 5.276051  
 H 1.238376 -1.822522 4.027287  
 H -0.882813 0.390326 3.643262  
 H -0.537672 -1.015821 2.574111  
 C -2.149528 4.597128 1.606150  
 C -3.256202 4.523623 0.526139  
 H -1.143877 4.648730 1.150858  
 H -2.272898 5.516140 2.217798  
 C -4.654151 4.892644 1.040922  
 H -3.245535 3.510027 0.077307  
 H -2.973682 5.220743 -0.285765  
 C -5.150784 4.040013 2.219103  
 H -5.380473 4.815888 0.207885  
 H -4.655396 5.959991 1.352327  
 H -5.257756 2.976901 1.920480  
 H -6.163138 4.382760 2.515978  
 H -3.928193 5.129938 3.685089  
 H -4.819464 3.729816 4.353035  
 O -1.242440 2.541845 2.505926

[MgCl<sub>2</sub>(THF)<sub>2</sub>(CL)] endocyclic:

47

Energy = 0.00 kcal/mol

Mg 0.041834 1.455005 0.511523  
 Cl 0.226531 3.751853 0.879271  
 O 2.035022 1.199291 -0.228879  
 O -2.330811 1.739588 1.631070  
 Cl -1.059373 0.164537 -1.098551  
 C 2.872108 2.266685 -0.754630  
 C 3.245712 1.789072 -2.154096  
 H 3.767003 2.371896 -0.104482  
 H 2.278060 3.194965 -0.702335  
 C 3.454918 0.276953 -1.932985

H 4.145903 2.294723 -2.547822  
H 2.407312 1.973499 -2.852627  
C 2.436920 -0.072818 -0.830002  
H 4.488679 0.079091 -1.589707  
H 3.285054 -0.317344 -2.848695  
H 2.867736 -0.713436 -0.035984  
H 1.514458 -0.541466 -1.220099  
C -2.335614 2.291705 2.882836  
C -3.424047 1.963989 0.679050  
O 0.503136 0.180369 2.061547  
C 1.348045 0.614122 3.176785  
C 0.996280 -0.317776 4.341322  
H 1.126361 1.675701 3.384122  
H 2.400122 0.511132 2.846274  
C 0.446356 -1.572483 3.634339  
H 0.210068 0.145761 4.964750  
H 1.872041 -0.530453 4.980460  
C -0.306323 -0.967306 2.452519  
H -0.214072 -2.176538 4.281911  
H 1.270219 -2.222792 3.280111  
H -1.308708 -0.602584 2.748235  
H -0.397512 -1.618518 1.565856  
C -3.384827 3.335465 3.214562  
C -3.325655 4.604972 2.331262  
H -3.213457 3.588623 4.274805  
H -4.394383 2.876271 3.147671  
C -4.029156 4.455806 0.975107  
H -2.265839 4.890415 2.176738  
H -3.800555 5.429962 2.897101  
C -3.432694 3.364635 0.075970  
H -3.991891 5.425559 0.440329  
H -5.106595 4.239609 1.148094  
H -2.392347 3.623826 -0.205172  
H -4.011255 3.304421 -0.868089  
H -4.378589 1.713316 1.184253  
H -3.218554 1.206412 -0.095861  
O -1.481977 1.921583 3.670258

## Structures related to the proton transfer reaction

[MgCl<sub>2</sub>(THF)(DVL)BuOH]...NHO

76

geomtry on BP-86/def2-SVPD level incl. COSMO ( $\epsilon = 7.58$ )

O -2.118566 2.399370 -0.409960  
C -2.247434 2.702583 -1.821219  
C -3.752411 2.926807 -2.031909  
H -1.812762 1.854686 -2.374001  
H -1.667443 3.625499 -2.038753  
C -4.264829 3.390546 -0.635998  
H -4.243402 1.984575 -2.335772  
H -3.939480 3.675478 -2.822518  
C -3.023232 3.303866 0.272423  
H -5.065780 2.724073 -0.268941  
H -4.667227 4.419306 -0.657642  
H -3.210052 2.879888 1.272639  
H -2.525926 4.292567 0.371920  
Cl -0.470321 -0.236207 -1.412310  
Cl -2.399453 0.441879 2.235252  
Mg -0.758870 1.032685 0.593844  
C 1.309761 4.916525 1.232120  
C 2.427919 5.663353 0.493315  
C 2.164061 5.598977 -1.013780  
H 3.409908 5.202048 0.722487  
H 2.474369 6.708315 0.849023  
C 2.123466 4.150942 -1.466564  
H 2.960670 6.109508 -1.587520  
H 1.208790 6.105235 -1.261099  
O 1.230002 3.313069 -0.648370  
H 3.119234 3.673278 -1.401294  
H 1.741201 4.028823 -2.493518  
C 0.895671 3.609134 0.602032  
H 0.383760 5.530630 1.254098  
H 1.548037 4.710309 2.291670  
O 0.198405 2.788096 1.219664  
O 0.840710 0.001623 1.543042  
C 1.688709 0.459534 2.616192  
H 0.889654 -1.001305 1.494581  
C 3.070116 0.874353 2.112849  
H 1.775217 -0.346327 3.372044  
H 1.176192 1.312475 3.099303  
C 3.972420 1.421884 3.228193  
H 2.942072 1.639652 1.319766  
H 3.555780 0.005039 1.623557



C 5.325075 1.928369 2.713539  
 H 4.135511 0.630233 3.988805  
 H 3.444243 2.244589 3.754820  
 H 5.884150 1.123545 2.196524  
 H 5.957205 2.302429 3.541174  
 H 5.190948 2.758000 1.990904  
 C 1.040649 -2.973778 1.379399  
 C 2.011258 -2.819174 0.219049  
 H 2.985839 -2.393091 0.514074  
 H 1.568720 -2.128044 -0.526827  
 H 2.201875 -3.772685 -0.321115  
 C -0.379407 -3.304534 0.942378  
 H -0.902027 -2.446132 0.473683  
 H -1.011444 -3.696151 1.755265  
 H -0.337934 -4.097571 0.163835  
 N 2.759542 -3.443475 3.154637  
 N 0.663457 -3.036845 3.857320  
 C 2.773465 -3.480487 4.548830  
 C 1.446971 -3.241999 4.989399  
 C 3.807271 -3.729883 5.458776  
 C 3.481838 -3.737173 6.835604  
 H 4.837204 -3.908987 5.122475  
 C 2.168118 -3.492821 7.272657  
 H 4.272845 -3.936453 7.572243  
 C 1.123670 -3.243530 6.352151  
 H 1.942054 -3.501834 8.348287  
 H 0.095719 -3.073970 6.698427  
 C 3.807430 -4.072455 2.361629  
 H 4.350238 -4.790254 3.002300  
 H 4.535560 -3.342354 1.960980  
 H 3.357403 -4.631103 1.525567  
 C -0.663905 -2.444395 3.927706  
 H -0.753641 -1.894214 4.880767  
 H -1.467316 -3.204673 3.888612  
 H -0.813592 -1.723874 3.104821  
 C 1.458344 -3.147682 2.695075

[MgCl<sub>2</sub>(THF)(DVL)BuO]<sup>-</sup>...NHOH<sup>+</sup>

76

geomtry on BP-86/def2-SVPD level incl. COSMO (ε = 7.58)

O -2.247583 2.313960 -0.375041  
 C -2.302032 2.556652 -1.797569  
 C -3.774167 2.906477 -2.083257  
 H -1.929797 1.643748 -2.290069  
 H -1.631883 3.410899 -2.038973  
 C -4.316329 3.410114 -0.712374  
 H -4.328397 2.011861 -2.420261

H -3.856295 3.671865 -2.876302  
 C -3.103099 3.308207 0.229731  
 H -5.139339 2.765335 -0.354449  
 H -4.698063 4.446009 -0.762763  
 H -3.332985 2.956796 1.249025  
 H -2.552130 4.272851 0.283297  
 Cl -0.900152 -0.512106 -1.124464  
 Cl -2.578793 0.655041 2.465999  
 Mg -0.846280 1.042400 0.777601  
 C 1.197769 5.024584 1.267368  
 C 2.408582 5.615415 0.532450  
 C 2.190992 5.480095 -0.976947  
 H 3.334834 5.081424 0.826704  
 H 2.541954 6.672261 0.827406  
 C 2.018033 4.014853 -1.337892  
 H 3.051882 5.873233 -1.550558  
 H 1.297691 6.058792 -1.289414  
 O 0.990695 3.340480 -0.537835  
 H 2.953804 3.445549 -1.176185  
 H 1.693876 3.866360 -2.381562  
 C 0.662714 3.728835 0.698295  
 H 0.342765 5.731928 1.216797  
 H 1.382017 4.855628 2.343739  
 O -0.127924 3.022743 1.331140  
 O 0.759958 0.262527 1.573117  
 C 1.623513 0.679895 2.567664  
 H 0.797011 -1.650408 1.440681  
 C 2.998916 1.161429 2.057332  
 H 1.840579 -0.151925 3.296898  
 H 1.190855 1.502037 3.199417  
 C 3.974181 1.526229 3.185572  
 H 2.848305 2.034407 1.386273  
 H 3.433725 0.364595 1.416802  
 C 5.336976 2.028983 2.693785  
 H 4.123768 0.638611 3.837240  
 H 3.509288 2.297183 3.836868  
 H 5.842504 1.264052 2.070796  
 H 6.011536 2.276619 3.536721  
 H 5.224168 2.941078 2.073848  
 C 1.167654 -2.711162 1.346566  
 C 2.265584 -2.613772 0.274709  
 H 3.152757 -2.063709 0.636194  
 H 1.842053 -2.031585 -0.562887  
 H 2.583365 -3.595661 -0.120625  
 C -0.003995 -3.609400 0.883966  
 H -0.422843 -3.175672 -0.042404  
 H -0.818676 -3.655460 1.629118  
 H 0.335610 -4.643791 0.680379

N 2.696374 -3.754796 3.159546  
 N 0.882166 -2.690785 3.832875  
 C 2.697071 -3.806322 4.556807  
 C 1.525560 -3.139603 4.983333  
 C 3.601504 -4.362887 5.474226  
 C 3.281636 -4.234200 6.833906  
 H 4.520153 -4.870015 5.153672  
 C 2.101757 -3.577575 7.260230  
 H 3.964271 -4.653860 7.585152  
 C 1.201080 -3.017246 6.343559  
 H 1.886150 -3.504156 8.334846  
 H 0.286521 -2.511128 6.676634  
 C 3.727433 -4.383294 2.334040  
 H 4.212030 -5.171992 2.930533  
 H 4.489168 -3.647682 2.022371  
 H 3.273614 -4.848370 1.447680  
 C -0.356314 -1.910782 3.831866  
 H -0.393761 -1.320084 4.760735  
 H -1.234019 -2.579752 3.795763  
 H -0.368307 -1.212918 2.974990  
 C 1.599850 -3.061896 2.734851

TS [MgCl<sub>2</sub>(THF)(DVL)BuOH]...NHO → [MgCl<sub>2</sub>(THF)(DVL)BuO]<sup>-</sup>...NHOH<sup>+</sup>  
 76

geomtry on BP-86/def2-SVPD level incl. COSMO (ε = 7.58)

O -2.125956 2.325743 -0.425181  
 C -2.240255 2.660804 -1.827910  
 C -3.736439 2.942086 -2.038944  
 H -1.832757 1.809906 -2.396351  
 H -1.628697 3.567920 -2.028033  
 C -4.235486 3.393066 -0.634184  
 H -4.259366 2.024534 -2.364500  
 H -3.895225 3.714051 -2.813436  
 C -2.995672 3.250030 0.270176  
 H -5.055416 2.743093 -0.279244  
 H -4.607727 4.433502 -0.634947  
 H -3.195676 2.819420 1.264913  
 H -2.466207 4.221103 0.383269  
 Cl -0.531816 -0.289755 -1.477334  
 Cl -2.469965 0.364013 2.184847  
 Mg -0.738022 0.934726 0.595447  
 C 1.247580 4.887308 1.250605  
 C 2.385460 5.612685 0.520380  
 C 2.139644 5.539848 -0.989265  
 H 3.357790 5.138602 0.764656  
 H 2.443025 6.659673 0.868884  
 C 2.086547 4.088228 -1.430275

H 2.948662 6.037094 -1.557356  
H 1.193000 6.054600 -1.251787  
O 1.170415 3.270261 -0.620933  
H 3.076133 3.600142 -1.347227  
H 1.719825 3.964263 -2.462859  
C 0.822181 3.579370 0.626122  
H 0.331385 5.515821 1.257545  
H 1.472293 4.684510 2.313715  
O 0.107189 2.773598 1.238248  
O 0.818178 -0.040237 1.499552  
C 1.660508 0.442757 2.530446  
H 0.906842 -1.273290 1.514089  
C 3.013740 0.948851 2.016426  
H 1.849513 -0.374948 3.265301  
H 1.146250 1.251338 3.094182  
C 3.933364 1.455806 3.135661  
H 2.837513 1.756542 1.275983  
H 3.511789 0.129669 1.457143  
C 5.273088 1.999555 2.625340  
H 4.118429 0.631210 3.856100  
H 3.406794 2.246595 3.711096  
H 5.832720 1.223168 2.066769  
H 5.914393 2.345694 3.458449  
H 5.120253 2.857046 1.939814  
C 1.095865 -2.664228 1.425000  
C 2.110347 -2.678473 0.276882  
H 3.089537 -2.251544 0.557231  
H 1.702808 -2.041531 -0.531106  
H 2.274803 -3.684955 -0.161793  
C -0.266809 -3.199862 0.950145  
H -0.663437 -2.546668 0.150160  
H -1.030578 -3.263214 1.741653  
H -0.149537 -4.220413 0.525777  
N 2.730963 -3.531683 3.186579  
N 0.733113 -2.862288 3.892282  
C 2.742430 -3.616756 4.580185  
C 1.461924 -3.212669 5.024243  
C 3.734425 -4.025645 5.481509  
C 3.402099 -4.020828 6.850377  
H 4.732670 -4.332507 5.143726  
C 2.124669 -3.617822 7.293362  
H 4.155455 -4.336917 7.585167  
C 1.128928 -3.207319 6.386248  
H 1.898085 -3.625615 8.368515  
H 0.134005 -2.903436 6.735829  
C 3.815279 -4.075188 2.374730  
H 4.303240 -4.881283 2.948525  
H 4.571134 -3.306297 2.130977

|   |           |           |          |
|---|-----------|-----------|----------|
| H | 3.415533  | -4.508182 | 1.448415 |
| C | -0.563295 | -2.199398 | 3.961395 |
| H | -0.618923 | -1.641220 | 4.911261 |
| H | -1.393460 | -2.929195 | 3.931539 |
| H | -0.679262 | -1.481656 | 3.132432 |
| C | 1.508588  | -3.039084 | 2.752242 |

## Details to the calculations of the metal-free deprotonation

For the metal-free deprotonation step, two minimum structures but no transition state corresponding to the proton transfer could be found. Instead, we optimized the reaction path using the NEB method [i-ii].

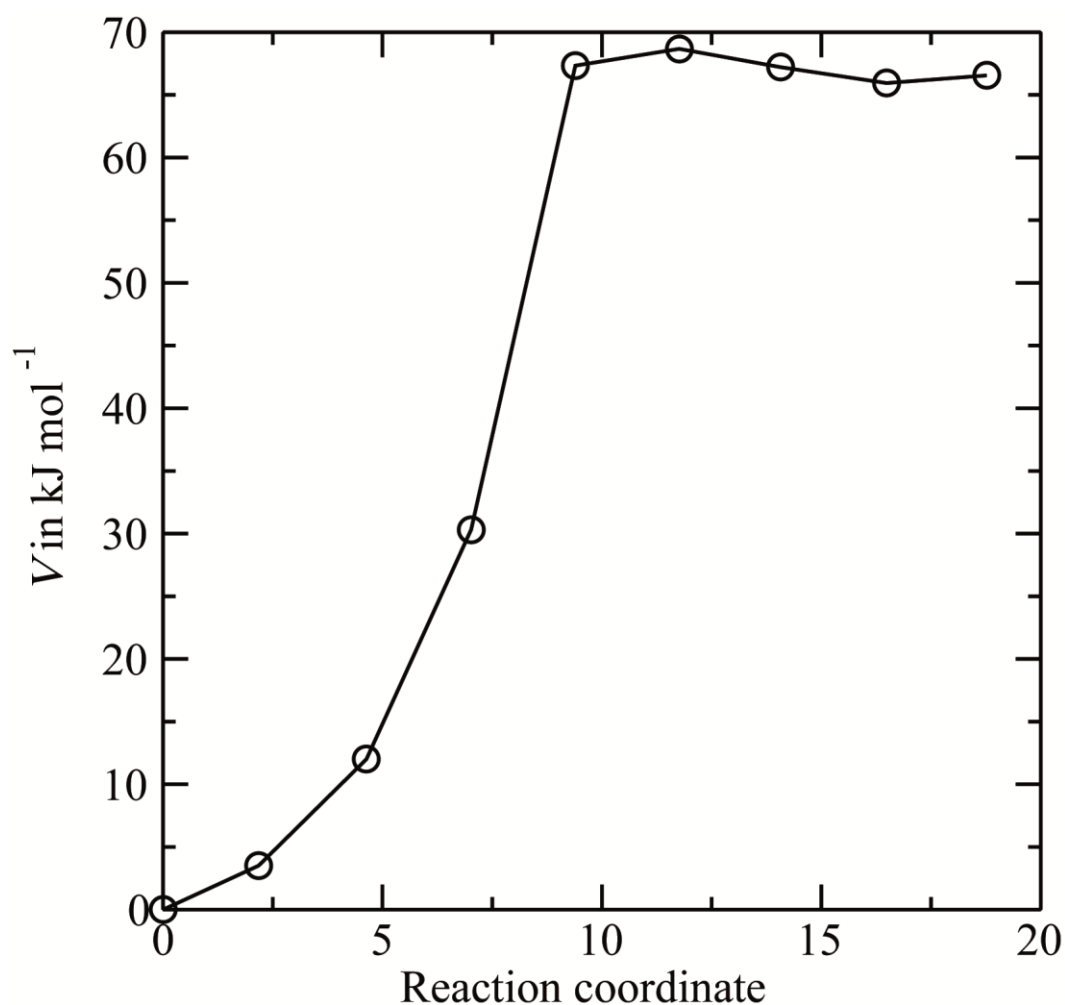

**Figure S1.** Proton transfer in the absence of  $\text{MgCl}_2$  (only NHO 7, VL, THF, butanol present).

## References

---

- [i] Henkelman, G.; Uberuaga, B. P.; Jónsson, H. A climbing image nudged elastic band method for finding saddle points and minimum energy paths. *J. Chem. Phys.* **2000**, *113*, 9901–9904.
- [ii] Henkelman, G.; Jónsson, H. Improved tangent estimate in the nudged elastic band method for finding minimum energy paths and saddle points. *J. Chem. Phys.* **2000**, *113*, 9978–9985.
